# Supplementary material for: Synthesis of aryl 2-bromo-2-chloro-1,1-difluoroethyl ethers through the base-mediated reaction between phenols and halothane
Source: publisher site journal article supplement (doi:10.3762/bjoc.17.9), 2021-01-11

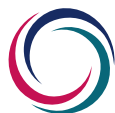

## Supporting Information

for

### Synthesis of aryl 2-bromo-2-chloro-1,1-difluoroethyl ethers through the base-mediated reaction between phenols and haloethane

Yukiko Karuo, Ayaka Kametani, Atsushi Tarui, Kazuyuki Sato, Kentaro Kawai and Masaaki Omote

*Beilstein J. Org. Chem.* **2021**, *17*, 89–96. doi:10.3762/bjoc.17.9

### Characterization data for 2b–p and copies of $^1\text{H}$ , $^{13}\text{C}$ , and $^{19}\text{F}$ NMR spectra

## Table of contents

|                                                                         |        |
|-------------------------------------------------------------------------|--------|
| 1. Characterization data for compounds <b>2b–p</b> .....                | S2–S4  |
| 2. $^1\text{H}$ , $^{13}\text{C}$ and $^{19}\text{F}$ NMR spectra ..... | S5–S28 |

## 1. Characterization data for 2b–p

**2-Bromo-2-chloro-1,1-difluoroethyl *p*-methoxyphenyl ether (2b):** The title product (2b) was purified by column chromatography (hexane:CHCl<sub>3</sub> = 19:1 to hexane:AcOEt = 9:1) and was obtained in 79% yield (237.2 mg). A yellow oil; <sup>1</sup>H NMR (400 MHz, CDCl<sub>3</sub>) δ: 3.81 (3H, s), 5.90 (1H, t, *J* = 5.0 Hz), 6.88 (2H, d, *J* = 9.1 Hz), 7.15 (2H, d, *J* = 9.1 Hz); <sup>13</sup>C NMR (100 MHz, CDCl<sub>3</sub>) δ: 53.5 (t, *J* = 42.1 Hz), 55.7, 114.6, 119.7 (t, *J* = 267.1 Hz), 123.2, 142.9, 157.9; <sup>19</sup>F NMR (376 MHz, CDCl<sub>3</sub>) δ: -78.2 (1F, dd, *J* = 137.5, 5.0 Hz), -78.5 (1F, dd, *J* = 137.5, 5.0 Hz); MS (EI) *m/z*: 300 (M<sup>+</sup>); HRMS (EI) Calcd. for C<sub>9</sub>H<sub>8</sub>BrClF<sub>2</sub>O<sub>2</sub>: 299.9364 (M<sup>+</sup>), Found: 299.9361.

**2-Bromo-2-chloro-1,1-difluoroethyl *o*-*t*-butylphenyl ether (2c):** The title product (2c) was purified by column chromatography and preparative TLC (hexane only). 2c was obtained in 47% yield (155.2 mg). A colorless oil; <sup>1</sup>H NMR (400 MHz, CDCl<sub>3</sub>) δ: 1.41 (9H, s), 5.97 (1H, t, *J* = 5.2 Hz), 7.13 (1H, ddd, *J* = 7.5, 7.5, 1.2 Hz), 7.18-7.24 (1H, m), 7.37-7.43 (2H, m); <sup>13</sup>C NMR (100 MHz, CDCl<sub>3</sub>) δ: 30.5, 35.0, 54.0 (t, *J* = 42.1 Hz), 119.1 (t, *J* = 3.6 Hz), 120.0 (t, *J* = 270.8 Hz), 125.0, 127.2, 127.8, 140.0, 149.6; <sup>19</sup>F NMR (376 MHz, CDCl<sub>3</sub>) δ: -76.9 (1F, ddd, *J* = 134.3, 5.2, 2.1 Hz), -77.2 (1F, ddd, *J* = 134.3, 5.2, 2.1 Hz); MS (EI) *m/z*: 326 (M<sup>+</sup>); HRMS (EI) Calcd. for C<sub>12</sub>H<sub>14</sub>BrClF<sub>2</sub>O: 325.9885 (M<sup>+</sup>), Found: 325.9879.

**2-Bromo-2-chloro-1,1-difluoroethyl *p*-nitrophenyl ether (2d):** The title product (2d) was purified by column chromatography and preparative TLC (hexane:AcOEt = 19:1). 2d was obtained in 3% yield (10.7 mg). A yellow oil; <sup>1</sup>H NMR (400 MHz, CDCl<sub>3</sub>) δ: 5.95 (1H, t, *J* = 5.1 Hz), 7.39 (2H, d, *J* = 8.4 Hz), 8.29 (2H, d, *J* = 8.4 Hz); <sup>13</sup>C NMR (100 MHz, CDCl<sub>3</sub>) δ: 52.9 (t, *J* = 40.6 Hz), 119.8 (t, *J* = 272.0 Hz), 121.8, 125.7, 145.8, 154.4; <sup>19</sup>F NMR (376 MHz, CDCl<sub>3</sub>) δ: -78.1 (1F, dd, *J* = 134.9, 4.9 Hz), -78.5 (1F, dd, *J* = 134.9, 4.9 Hz); MS (EI) *m/z*: 315 (M<sup>+</sup>); HRMS (EI) Calcd. for C<sub>8</sub>H<sub>5</sub>BrClF<sub>2</sub>NO<sub>3</sub>: 314.9109 (M<sup>+</sup>), Found: 314.9106.

**2-Bromo-2-chloro-1,1-difluoroethyl *p*-trifluoromethylphenyl ether (2e):** The title product (2e) was purified by column chromatography (hexane only). 2e was obtained in 48% yield (163.3 mg). A pale yellow oil; <sup>1</sup>H NMR (400 MHz, CDCl<sub>3</sub>) δ: 5.93 (1H, t, *J* = 5.0 Hz), 7.35 (2H, d, *J* = 8.3 Hz), 7.67 (2H, d, *J* = 8.3 Hz); <sup>13</sup>C NMR (100 MHz, CDCl<sub>3</sub>) δ: 53.1 (t, *J* = 40.8 Hz), 119.8 (t, *J* = 270.2 Hz), 121.9, 123.9 (q, *J* = 272.3 Hz), 127.2 (q, *J* = 3.5 Hz), 128.8 (q, *J* = 33.0 Hz), 152.2; <sup>19</sup>F NMR (376 MHz, CDCl<sub>3</sub>) δ: -62.2 (3F, s), -78.0 (1F, dd, *J* = 136.2, 4.9 Hz), -78.3 (1F, dd, *J* = 136.2, 4.9 Hz); MS (EI) *m/z*: 338 (M<sup>+</sup>); HRMS (EI) Calcd. for C<sub>9</sub>H<sub>5</sub>BrClF<sub>5</sub>O: 337.9132 (M<sup>+</sup>), Found: 337.9135.

**Ethyl *p*-(2-bromo-2-chloro-1,1-difluoroethoxy)benzoate (2f):** The title product (2f) was purified by column chromatography and preparative TLC (hexane:AcOEt = 15:1). 2f was obtained in 47% yield (161.0 mg). A pale yellow oil; <sup>1</sup>H NMR (400 MHz, CDCl<sub>3</sub>) δ: 1.40 (3H, t, *J* = 7.1 Hz), 4.39 (2H, q, *J* = 7.1 Hz), 5.92 (3H, t, *J* = 5.1 Hz), 7.29 (2H, d, *J* = 8.4 Hz), 8.08 (2H, d, *J* = 8.4 Hz); <sup>13</sup>C NMR (100 MHz, CDCl<sub>3</sub>) δ: 14.5, 53.3 (t, *J* = 41.2 Hz), 61.3, 119.7 (t, *J* = 270.1 Hz), 121.2, 128.7, 131.5, 153.2, 165.7; <sup>19</sup>F NMR (376 MHz, CDCl<sub>3</sub>) δ: -78.0 (1F, dd, *J* = 136.5, 5.1 Hz), -78.3 (1F, dd, *J* = 136.5, 5.1 Hz); MS (EI) *m/z*: 342 (M<sup>+</sup>); HRMS (EI) Calcd. for C<sub>11</sub>H<sub>10</sub>BrClF<sub>2</sub>O<sub>3</sub>: 341.9470 (M<sup>+</sup>), Found: 341.9473.

**2-Bromo-2-chloro-1,1-difluoroethyl *o*-phenylphenyl ether (2h):** The title product (2h) was purified by column chromatography and preparative TLC (hexane only). 2h was obtained in 71% yield (247.1 mg). A colorless oil; <sup>1</sup>H NMR (400 MHz, CDCl<sub>3</sub>) δ: 5.64 (1H, t, *J* = 5.2 Hz), 7.30-7.49 (9H, m); <sup>13</sup>C NMR (100 MHz, CDCl<sub>3</sub>) δ: 53.4 (t, *J* = 41.2 Hz), 119.6 (t, *J* = 268.8 Hz), 122.4, 126.7, 127.6, 128.2, 128.6, 129.7, 131.5, 135.9, 137.4, 146.7; <sup>19</sup>F NMR (376

MHz, CDCl<sub>3</sub>)  $\delta$ : -77.5 (2F, dd,  $J$  = 5.2, 3.1 Hz); MS (EI)  $m/z$ : 346 (M<sup>+</sup>); HRMS (EI) Calcd. for C<sub>14</sub>H<sub>10</sub>BrClF<sub>2</sub>O: 345.9572 (M<sup>+</sup>), Found: 345.9562.

**2-Bromo-2-chloro-1,1-difluoroethyl *m*-phenylphenyl ether (2i):** The title product (2i) was purified by column chromatography and preparative TLC (hexane only). 2i was obtained in 79% yield (275.9 mg). A pale yellow oil; <sup>1</sup>H NMR (400 MHz, CDCl<sub>3</sub>)  $\delta$ : 5.94 (1H, t,  $J$  = 5.1 Hz), 7.19-7.24 (1H, m), 7.35-7.53 (6H, m), 7.56-7.61 (2H, m); <sup>13</sup>C NMR (100 MHz, CDCl<sub>3</sub>)  $\delta$ : 53.5 (t,  $J$  = 41.7 Hz), 119.7 (t,  $J$  = 269.6 Hz), 120.5, 120.6, 125.3, 127.3, 128.0, 129.1, 130.0, 140.0, 143.2, 150.0; <sup>19</sup>F NMR (376 MHz, CDCl<sub>3</sub>)  $\delta$ : -77.7 (1F, dd,  $J$  = 136.9, 5.1 Hz), -78.1 (1F, dd,  $J$  = 136.9, 5.1 Hz); MS (EI)  $m/z$ : 346 (M<sup>+</sup>); HRMS (EI) Calcd. for C<sub>14</sub>H<sub>10</sub>BrClF<sub>2</sub>O: 345.9572 (M<sup>+</sup>), Found: 345.9567.

**2-Bromo-2-chloro-1,1-difluoroethyl *p*-phenylphenyl ether (2j):** The title product (2j) was purified by column chromatography (hexane only) and was obtained in 88% yield (304.4 mg). White solid; mp: 46.0-46.5 °C; <sup>1</sup>H NMR (400 MHz, CDCl<sub>3</sub>)  $\delta$ : 5.93 (1H, t,  $J$  = 4.8 Hz), 7.30 (2H, d,  $J$  = 7.9 Hz), 7.37 (1H, t,  $J$  = 7.2 Hz), 7.45 (2H, dd,  $J$  = 7.9, 7.2 Hz), 7.58 (4H, t,  $J$  = 8.4 Hz); <sup>13</sup>C NMR (100 MHz, CDCl<sub>3</sub>)  $\delta$ : 53.5 (t,  $J$  = 41.6 Hz), 119.7 (t,  $J$  = 267.7 Hz), 122.1, 127.2, 127.7, 128.4, 129.0, 139.7, 140.1, 149.1; <sup>19</sup>F NMR (376 MHz, CDCl<sub>3</sub>)  $\delta$ : -78.0 (1F, dd,  $J$  = 137.1, 4.8 Hz), -78.1 (1F, dd,  $J$  = 137.1, 4.8 Hz); MS (EI)  $m/z$ : 346 (M<sup>+</sup>); HRMS (EI) Calcd. for C<sub>14</sub>H<sub>10</sub>BrClF<sub>2</sub>O: 345.9572 (M<sup>+</sup>), Found: 345.9566.

**2-Bromo-2-chloro-1,1-difluoroethyl 1-naphthyl ether (2k):** The title product (2k) was purified by column chromatography (hexane only). 2k was obtained in 85% yield (275.3 mg). A colorless oil; <sup>1</sup>H NMR (400 MHz, CDCl<sub>3</sub>)  $\delta$ : 6.09 (1H, t,  $J$  = 4.8 Hz), 7.39-7.49 (2H, m), 7.51-7.60 (2H, m), 7.74-7.80 (1H, m), 7.84-7.91 (1H, m), 8.21-8.29 (1H, m); <sup>13</sup>C NMR (100 MHz, CDCl<sub>3</sub>)  $\delta$ : 53.7 (t,  $J$  = 41.7 Hz), 117.4, 120.1 (t,  $J$  = 268.1 Hz), 122.0, 125.3, 126.5, 126.8, 126.9, 127.7, 127.9, 134.8, 145.5; <sup>19</sup>F NMR (376 MHz, CDCl<sub>3</sub>)  $\delta$ : -77.5 (1F, dd,  $J$  = 136.6, 4.8 Hz), -78.0 (1F, dd,  $J$  = 136.6, 4.8 Hz); MS (EI)  $m/z$ : 320 (M<sup>+</sup>); HRMS (EI) Calcd. for C<sub>12</sub>H<sub>8</sub>BrClF<sub>2</sub>O: 319.9415 (M<sup>+</sup>), Found: 319.9416.

**2-Bromo-2-chloro-1,1-difluoroethyl *o*-iodophenyl ether (2l):** The title product (2l) was purified by column chromatography (hexane only) and was obtained in 67% yield (266.7 mg). A yellow oil; <sup>1</sup>H NMR (400 MHz, CDCl<sub>3</sub>)  $\delta$ : 6.01 (1H, t,  $J$  = 5.6 Hz), 6.97-7.03 (1H, m), 7.30-7.40 (2H, m), 7.86 (1H, dd,  $J$  = 8.4, 1.6 Hz); <sup>13</sup>C NMR (100 MHz, CDCl<sub>3</sub>)  $\delta$ : 53.5 (t,  $J$  = 40.3 Hz), 89.9, 119.9 (t,  $J$  = 270.5 Hz), 122.0, 127.9, 129.6, 140.3, 149.9; <sup>19</sup>F NMR (376 MHz, CDCl<sub>3</sub>)  $\delta$ : -77.4 (1F, ddd,  $J$  = 135.0, 5.8, 1.1 Hz), -77.8 (1F, ddd,  $J$  = 135.0, 5.8, 1.1 Hz); MS (EI)  $m/z$ : 396 (M<sup>+</sup>); HRMS (EI) Calcd. for C<sub>8</sub>H<sub>5</sub>BrClF<sub>2</sub>IO: 395.8225 (M<sup>+</sup>), Found: 395.8231.

***o*-Allylphenyl 2-bromo-2-chloro-1,1-difluoroethyl ether (2m):** The title product (2m) was purified by column chromatography (hexane only) and was obtained in 81% yield (253.4 mg). A colorless oil; <sup>1</sup>H NMR (400 MHz, CDCl<sub>3</sub>)  $\delta$ : 3.49 (2H, d,  $J$  = 6.8 Hz), 5.06-5.14 (2H, m), 5.95 (1H, t,  $J$  = 4.6 Hz), 5.96 (1H, ddt,  $J$  = 17.6, 9.4, 6.7 Hz), 7.17-7.32 (4H, m); <sup>13</sup>C NMR (100 MHz, CDCl<sub>3</sub>)  $\delta$ : 34.2, 53.7 (t,  $J$  = 41.8 Hz), 116.5, 119.9 (t,  $J$  = 268.9 Hz), 121.8, 126.5, 127.5, 130.8, 133.2, 136.2, 147.7; <sup>19</sup>F NMR (376 MHz, CDCl<sub>3</sub>)  $\delta$ : -77.3 (1F, dd,  $J$  = 137.1, 4.6 Hz), -77.6 (1F, dd,  $J$  = 137.1, 4.6 Hz); MS (EI)  $m/z$ : 310 (M<sup>+</sup>); HRMS (EI) Calcd. for C<sub>11</sub>H<sub>10</sub>BrClF<sub>2</sub>O: 309.9572 (M<sup>+</sup>), Found: 309.9568.

**2-Bromo-2-chloro-1,1-difluoroethyl *o*-propenylphenyl ether (2n):** The title product (2n) was purified by column chromatography and preparative TLC (hexane only). 2n was obtained an inseparable mixture of *cis-trans* isomers (1:2.2) in 71% yield (219.9 mg). A colorless oil; <sup>1</sup>H NMR (400 MHz, CDCl<sub>3</sub>)  $\delta$ : 1.81 (dd,  $J$  = 7.0, 1.7 Hz, *cis*-isomer)

and 1.91 (dd,  $J = 6.7, 1.7$  Hz, *trans*-isomer) (3H), 5.88 (dq,  $J = 11.4, 7.0$  Hz, *cis*-isomer) and 6.26 (dd,  $J = 15.7, 6.7$  Hz, *trans*-isomer) (1H), 5.93 (t,  $J = 5.0$  Hz, *cis*-isomer) and 5.98 (t,  $J = 4.8$  Hz, *trans*-isomer) (1H), 6.54 (dq,  $J = 11.4, 1.7$  Hz, *cis*-isomer) and 6.76 (d,  $J = 15.7$  Hz, *trans*-isomer) (1H), 7.17-7.31 (3H, m), 7.33-7.38 (m, *cis*-isomer) and 7.49-7.57 (m, *trans*-isomer) (1H);  $^{13}\text{C}$  NMR (100 MHz,  $\text{CDCl}_3$ )  $\delta$ : 14.7 (*cis*-isomer), 19.0 (*trans*-isomer), 53.6 (t,  $J = 41.8$  Hz, *cis*-isomer), 53.7 (t,  $J = 41.8$  Hz, *trans*-isomer), 119.77 (t,  $J = 267.9$  Hz, *cis*-isomer), 119.81 (t,  $J = 268.0$  Hz, *trans*-isomer), 122.2 (*cis*-isomer), 122.4 (*trans*-isomer), 124.5, 126.0 (*cis*-isomer), 126.4 (*trans*-isomer), 126.6 (*trans*-isomer), 127.7 (*trans*-isomer), 127.9 (*cis*-isomer), 128.4 (*trans*-isomer), 128.8 (*cis*-isomer), 130.9 (*cis*-isomer), 131.4 (*cis*-isomer), 131.9 (*trans*-isomer), 146.1 (*trans*-isomer), 147.2 (*cis*-isomer);  $^{19}\text{F}$  NMR (376 MHz,  $\text{CDCl}_3$ )  $\delta$ : -77.2 (1F, dd,  $J = 137.1, 4.8$  Hz, *trans*-isomer), -77.6 (1F, dd,  $J = 137.1, 4.8$  Hz, *trans*-isomer), -77.51 (1F, dd,  $J = 9.0, 5.0$  Hz, *cis*-isomer), -77.53 (1F, dd,  $J = 9.0, 5.0$  Hz, *cis*-isomer); MS (EI)  $m/z$ : 310 ( $\text{M}^+$ ); HRMS (EI) Calcd. for  $\text{C}_{11}\text{H}_{10}\text{BrClF}_2\text{O}$ : 309.9572 ( $\text{M}^+$ ), Found: 309.9568.

**(*E*)-2'-(2-Bromo-2-chloro-1,1-difluoroethoxy)-chalcone (2o):** The title product (**2o**) was purified by column chromatography and preparative TLC (hexane: AcOEt = 9:1). **2o** was obtained in 56% yield (225.0 mg). A yellow solid; mp: 66.5-67.1 °C;  $^1\text{H}$  NMR (400 MHz,  $\text{CDCl}_3$ )  $\delta$ : 5.97 (1H, t,  $J = 4.8$  Hz), 7.32-7.39 (2H, m), 7.41-7.54 (4H, m), 7.55-7.62 (1H, m), 7.79-7.84 (1H, m), 7.96-8.01 (2H, m), 8.14 (1H, d,  $J = 16.0$  Hz);  $^{13}\text{C}$  NMR (100 MHz,  $\text{CDCl}_3$ )  $\delta$ : 53.2 (t,  $J = 41.0$  Hz), 119.9 (t,  $J = 269.4$  Hz), 122.7, 125.0, 126.9, 127.7, 128.6, 128.8, 129.0, 131.5, 132.9, 138.1, 138.5, 148.4, 191.2;  $^{19}\text{F}$  NMR (376 MHz,  $\text{CDCl}_3$ )  $\delta$ : -77.2 (1F, dd,  $J = 136.4, 4.8$  Hz), -77.8 (1F, dd,  $J = 136.4, 4.8$  Hz); MS (EI)  $m/z$ : 400 ( $\text{M}^+$ ); HRMS (EI) Calcd. for  $\text{C}_{17}\text{H}_{12}\text{BrClF}_2\text{O}_2$ : 399.9677 ( $\text{M}^+$ ), Found: 399.9670.

***o*-Aminophenyl 2-bromo-2-chloro-1,1-difluoroethyl ether (2p):** The title product (**2p**) was purified by column chromatography (hexane: AcOEt = 9:1) and was obtained in 51% yield (145.3 mg). A yellow oil;  $^1\text{H}$  NMR (400 MHz,  $\text{CDCl}_3$ )  $\delta$ : 3.93 (2H, br s), 5.98 (1H, t,  $J = 4.4$  Hz), 6.72 (1H, dd,  $J = 7.6, 1.2$  Hz), 6.79 (1H, dd,  $J = 8.0, 1.6$  Hz), 7.06 (1H, dd,  $J = 7.6, 1.6$  Hz), 7.16 (2H, dd,  $J = 8.0, 1.2$  Hz);  $^{13}\text{C}$  NMR (100 MHz,  $\text{CDCl}_3$ )  $\delta$ : 53.7 (t,  $J = 41.9$  Hz), 116.7, 118.4, 120.2 (t,  $J = 267.4$  Hz), 122.6, 127.4, 136.5, 139.9;  $^{19}\text{F}$  NMR (376 MHz,  $\text{CDCl}_3$ )  $\delta$ : -77.7 (1F, dd,  $J = 137.1, 4.4$  Hz), -78.5 (1F, dd,  $J = 137.1, 4.4$  Hz); MS (EI)  $m/z$ : 285 ( $\text{M}^+$ ); HRMS (EI) Calcd. for  $\text{C}_8\text{H}_7\text{BrClF}_2\text{NO}$ : 284.9368 ( $\text{M}^+$ ), Found: 284.9363.

## 2. $^1\text{H}$ , $^{13}\text{C}$ and $^{19}\text{F}$ NMR spectra

### 2-Bromo-2-chloro-1,1-difluoroethyl phenyl ether (2a)

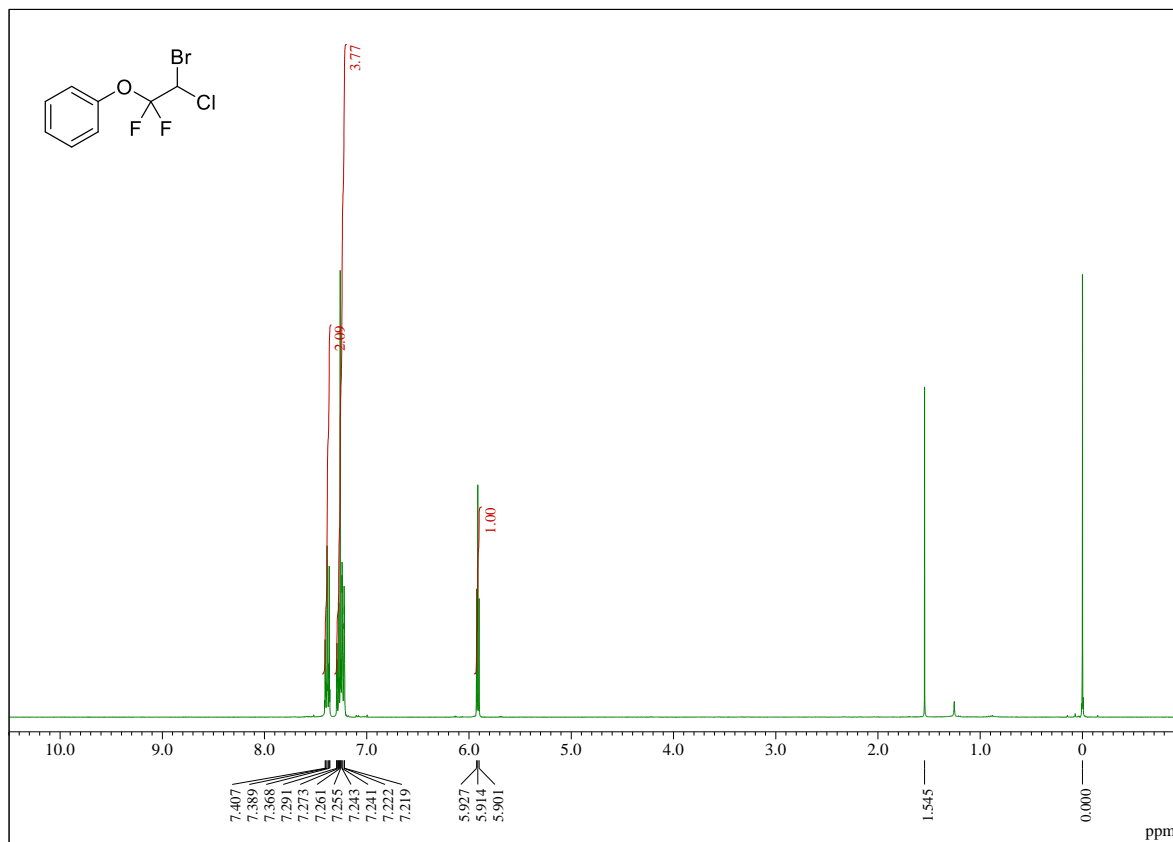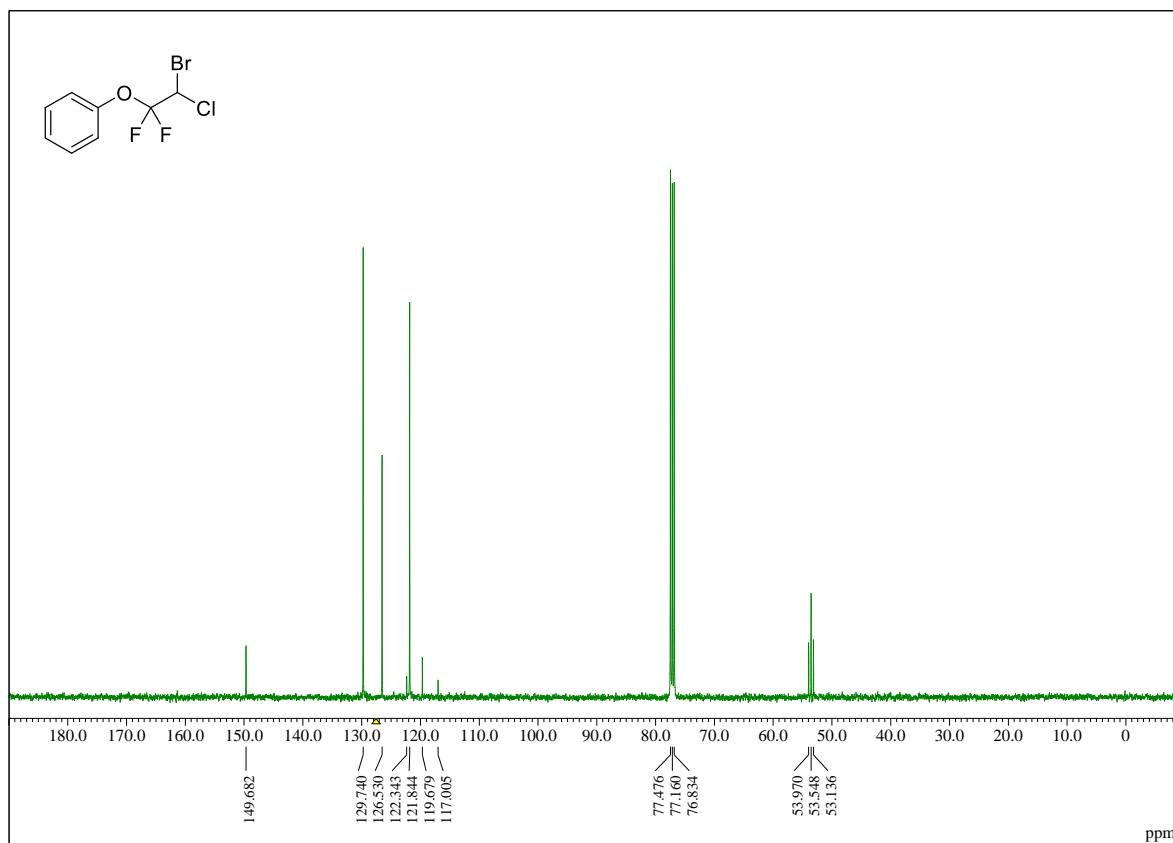

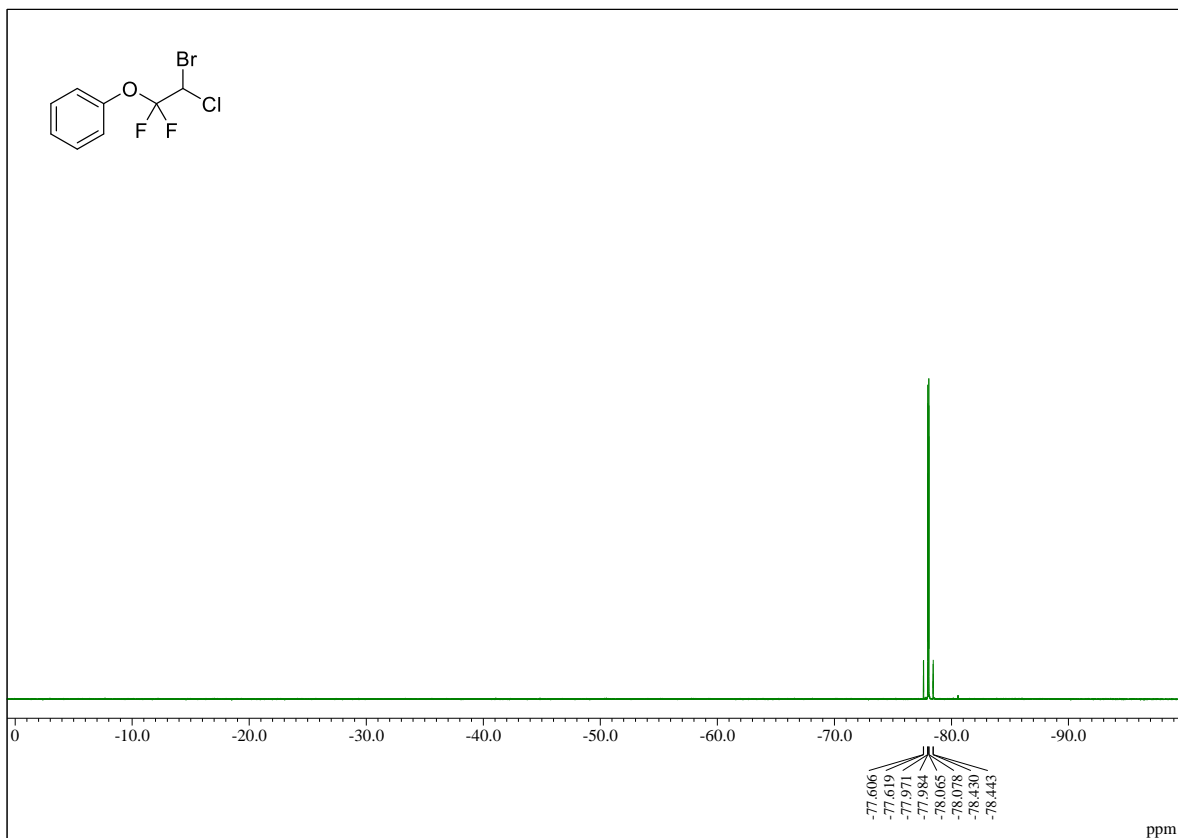

**2-Bromo-2-chloro-1,1-difluoroethyl *p*-methoxyphenyl ether (2b)**

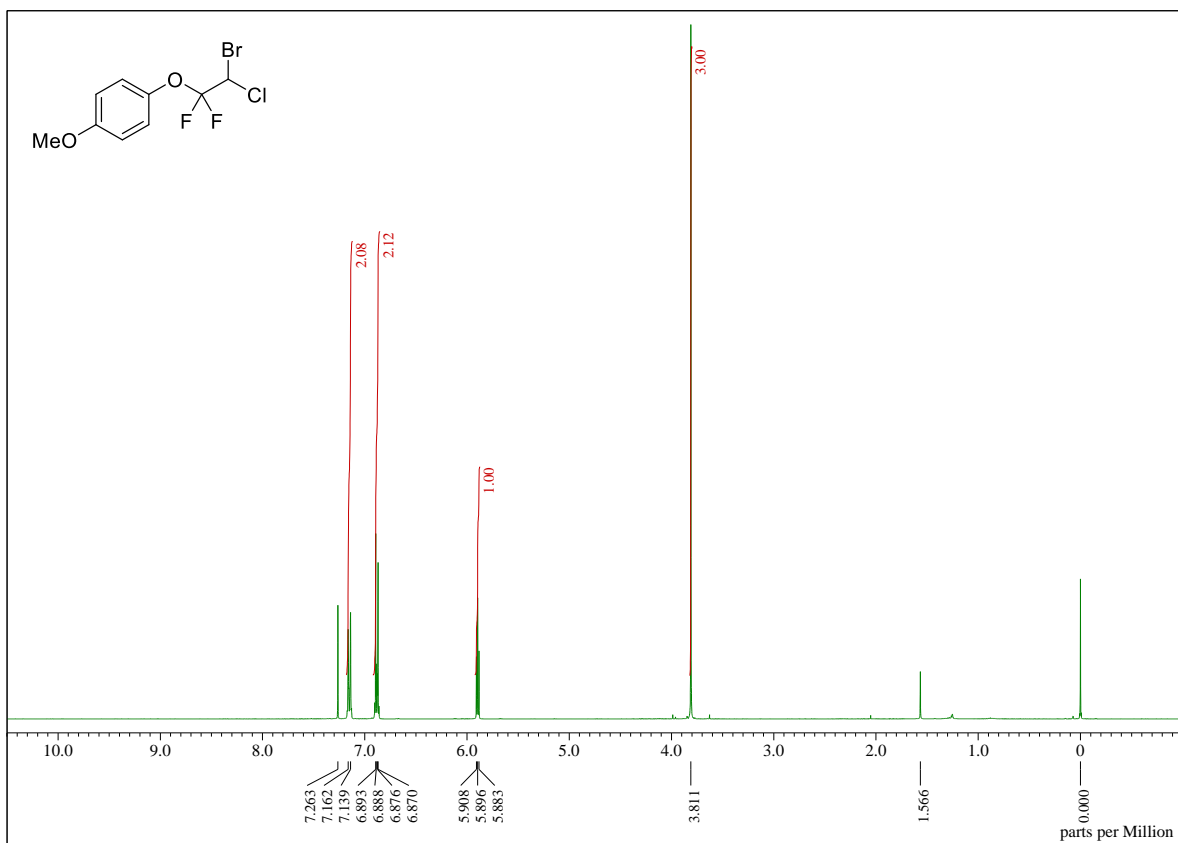

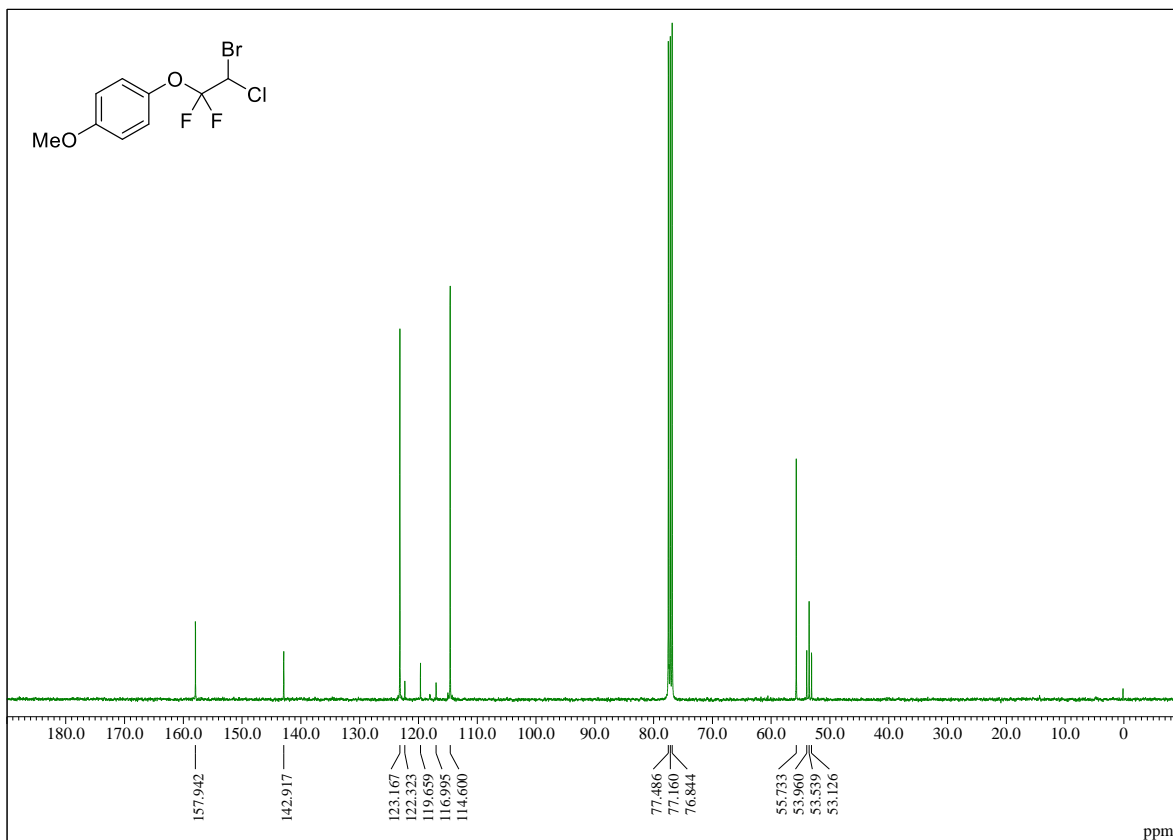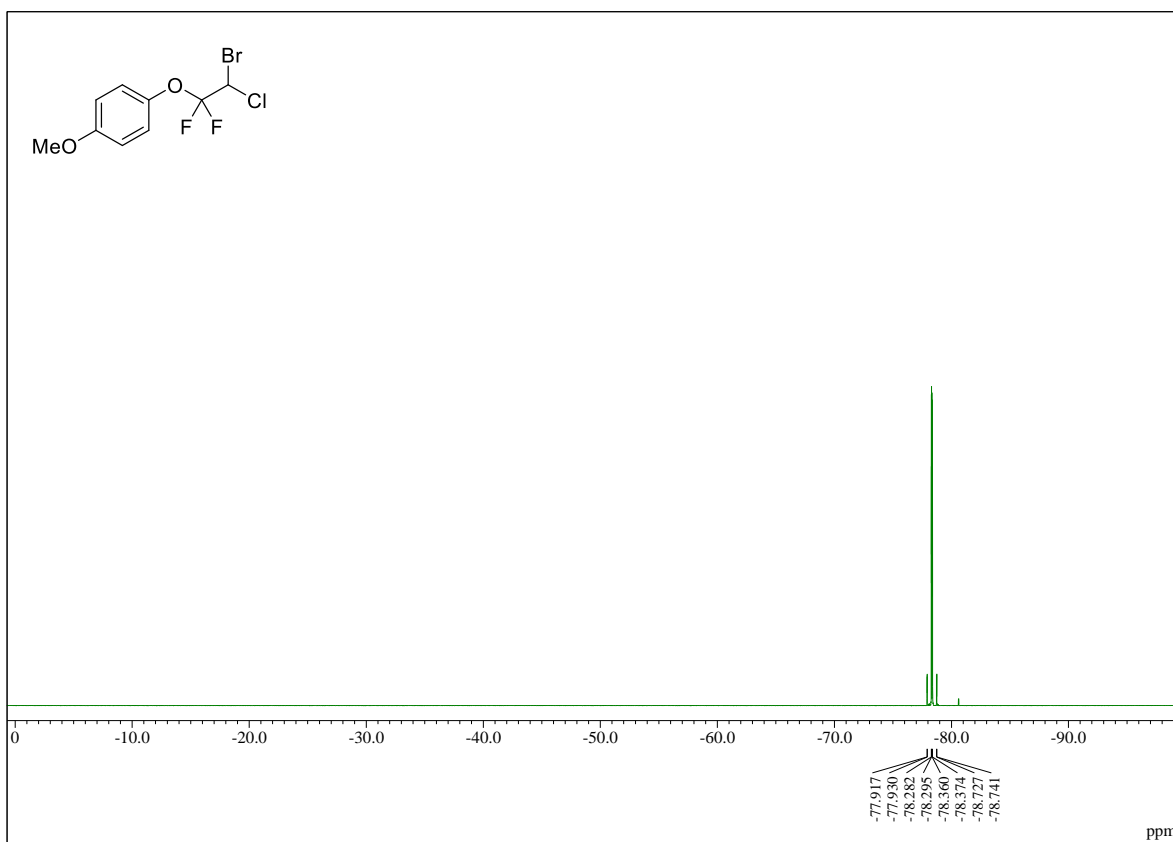



## 2-Bromo-2-chloro-1,1-difluoroethyl *o*-*t*-butylphenyl ether (2c)

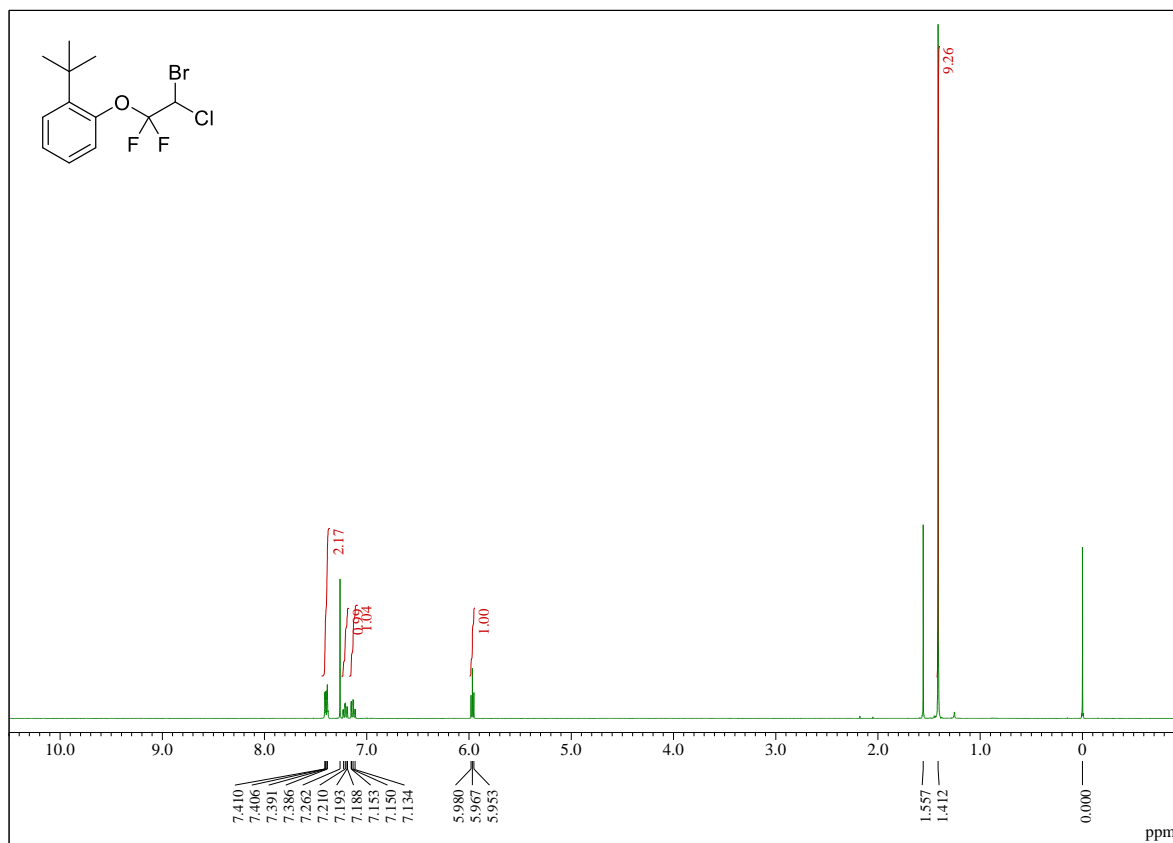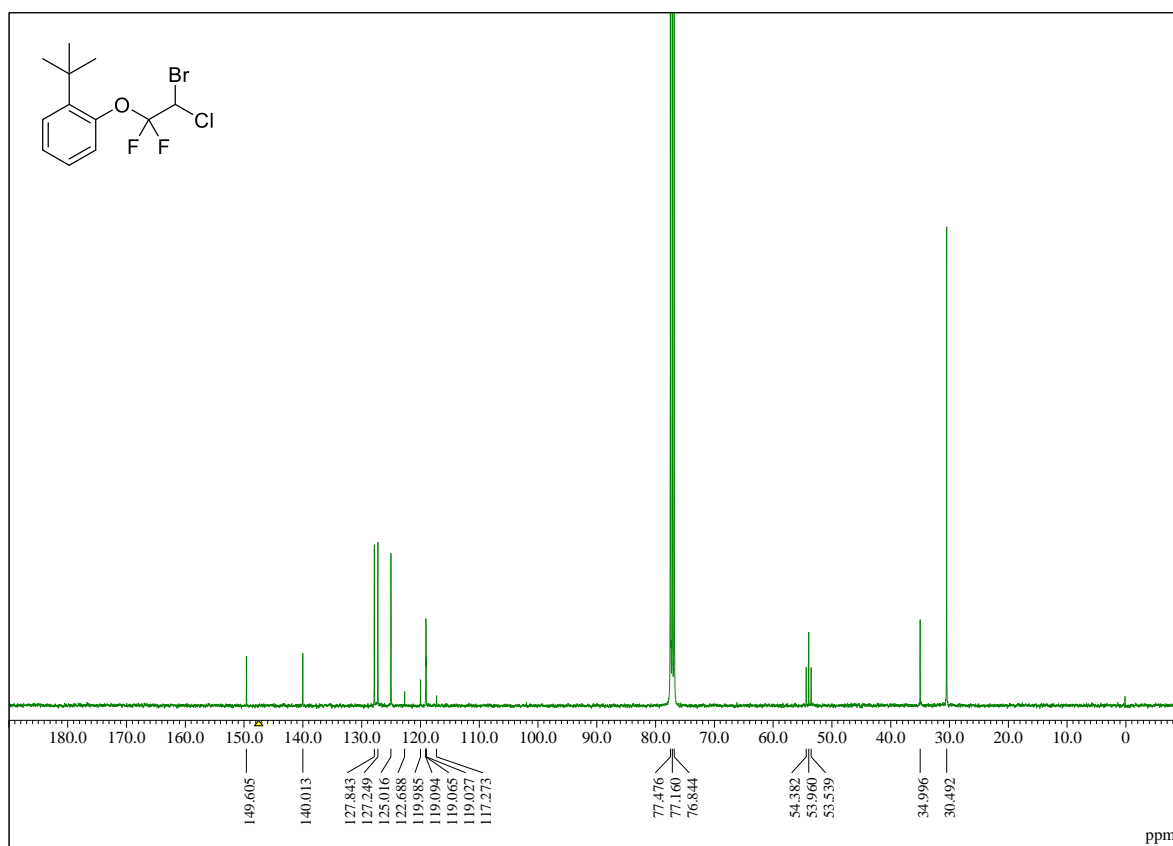

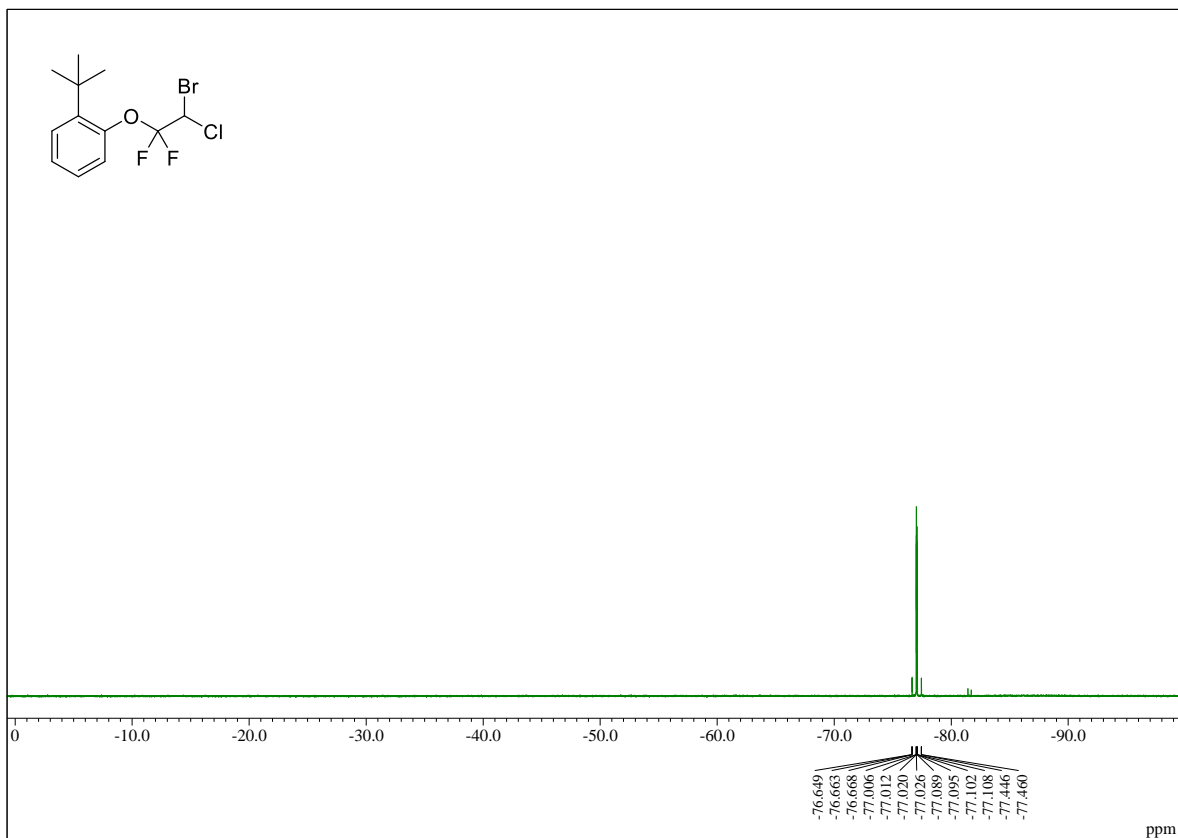

**2-Bromo-2-chloro-1,1-difluoroethyl *p*-nitrophenyl ether (2d)**

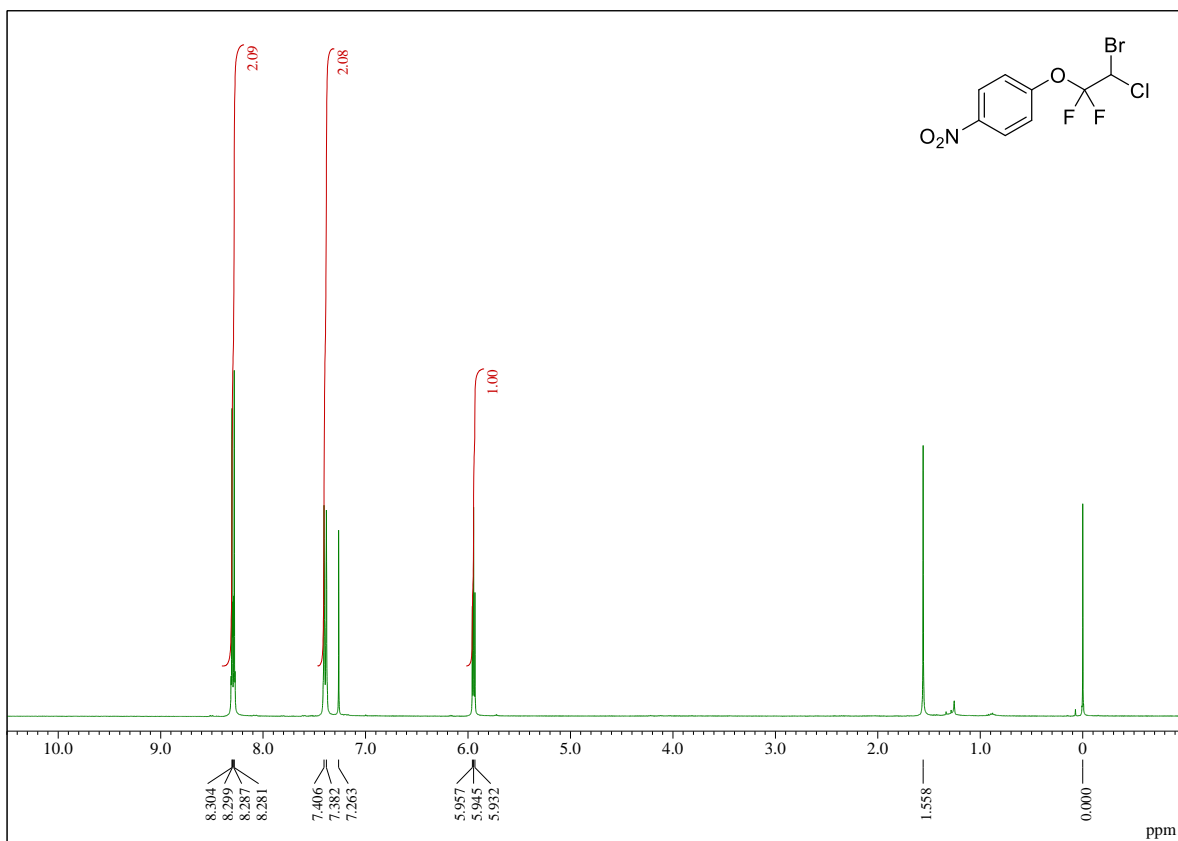

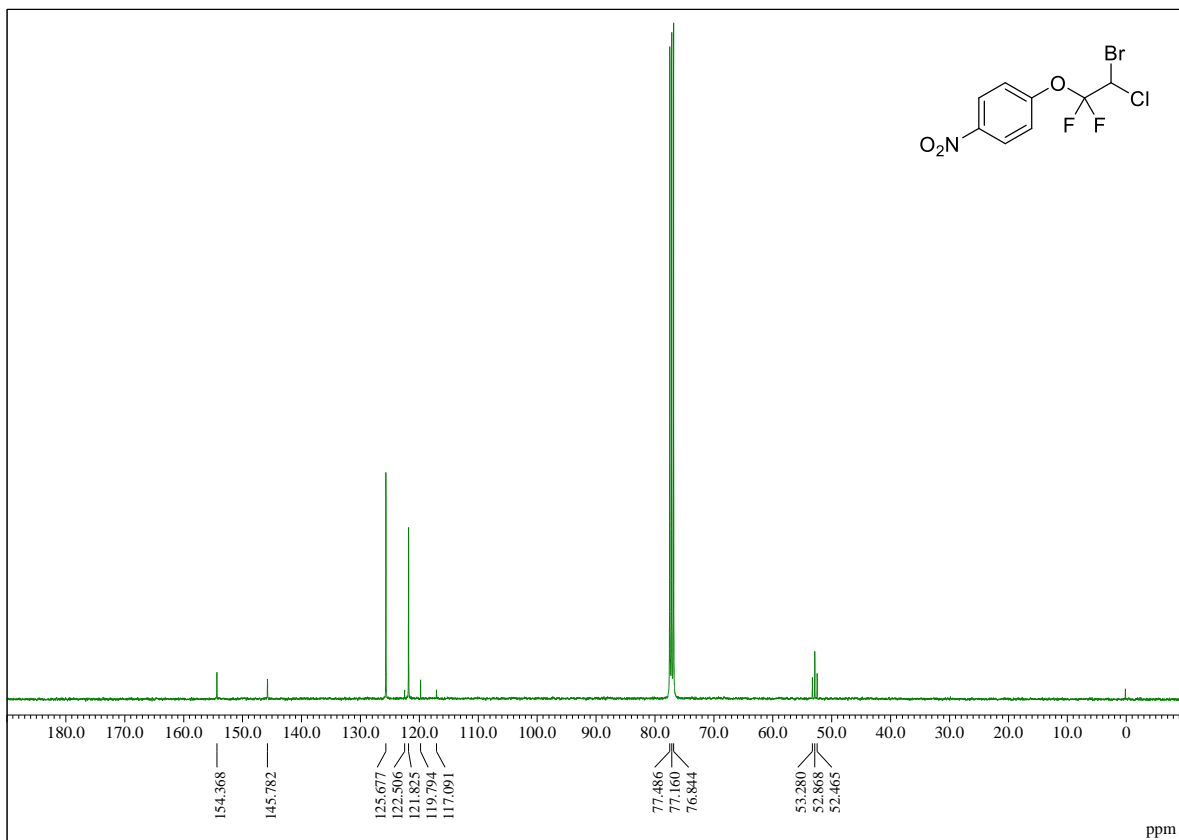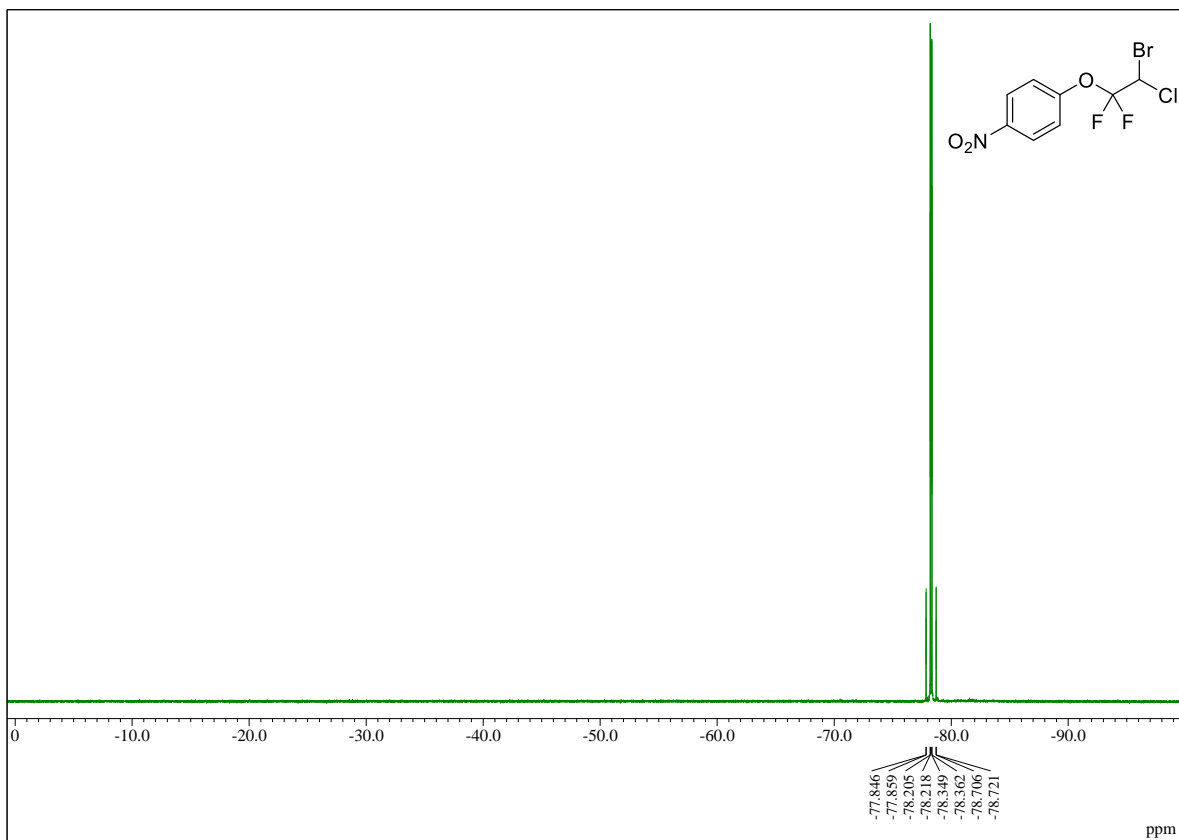

## 2-Bromo-2-chloro-1,1-difluoroethyl *p*-trifluoromethylphenyl ether (2e)

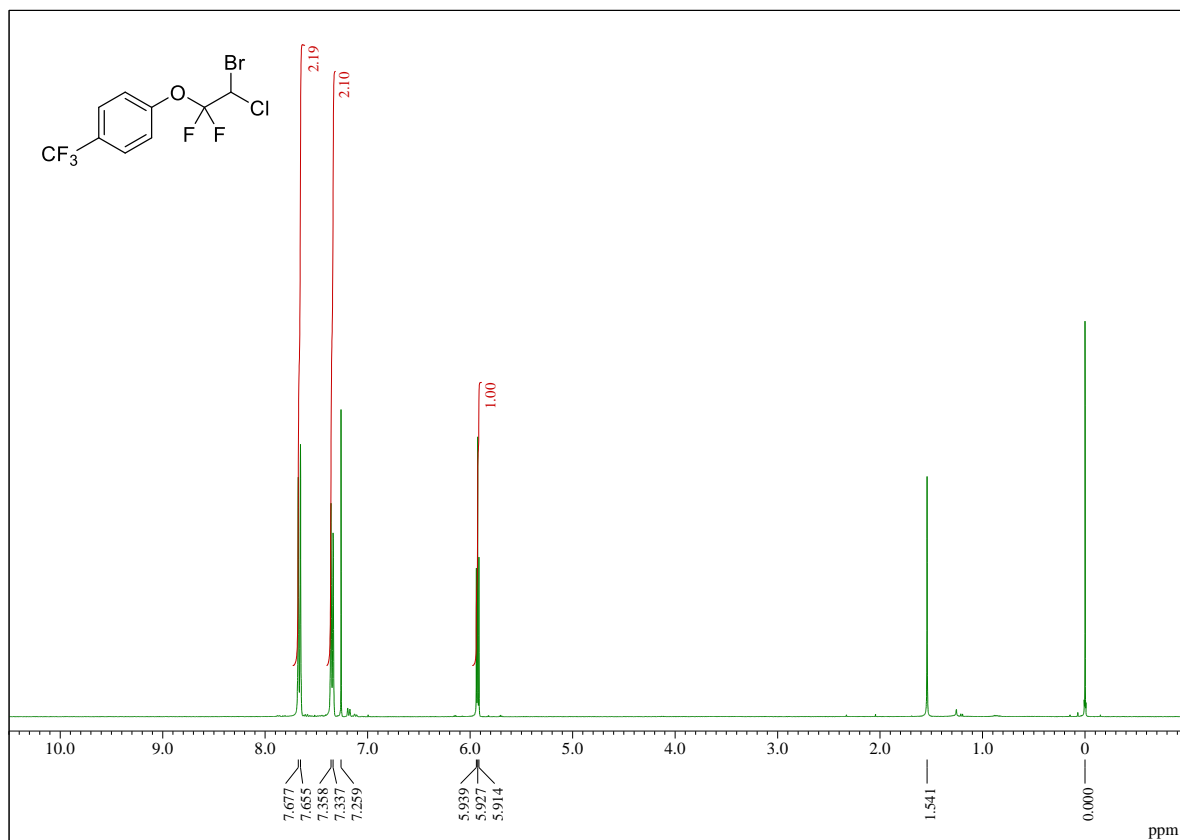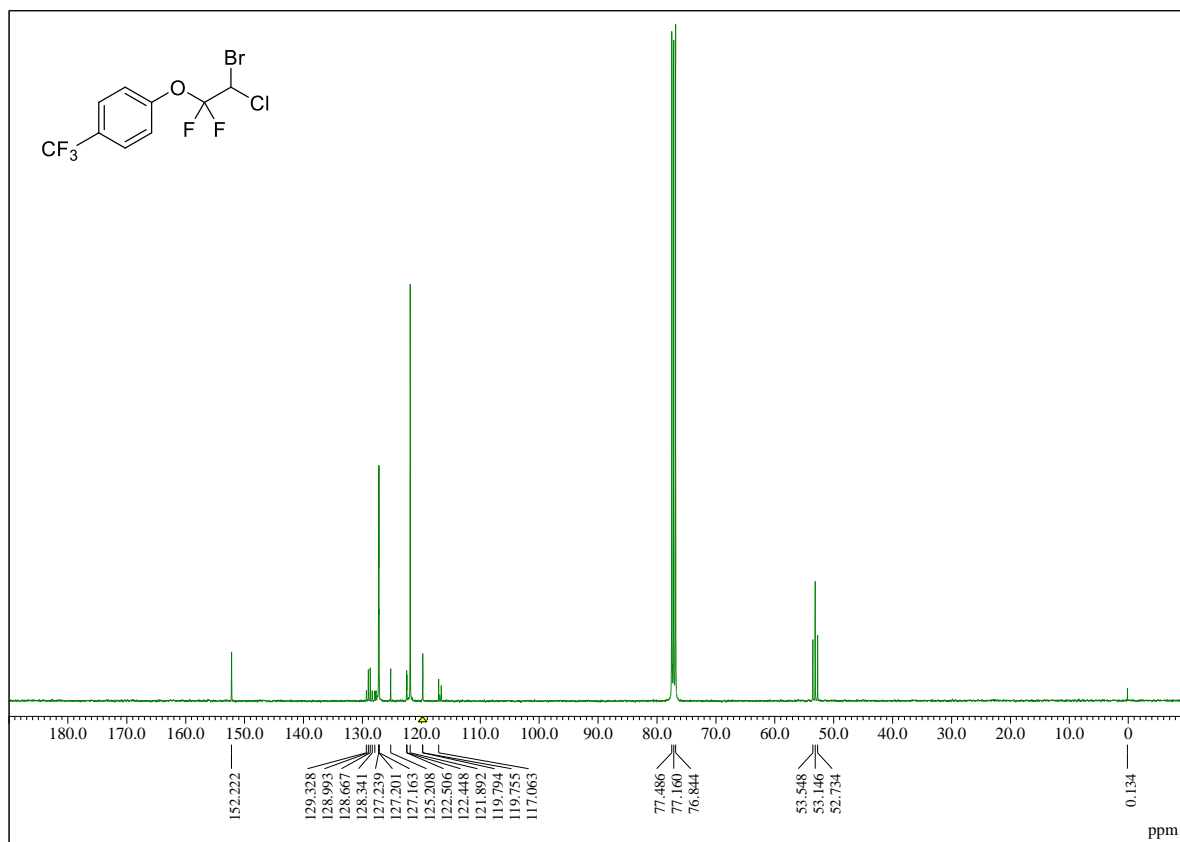

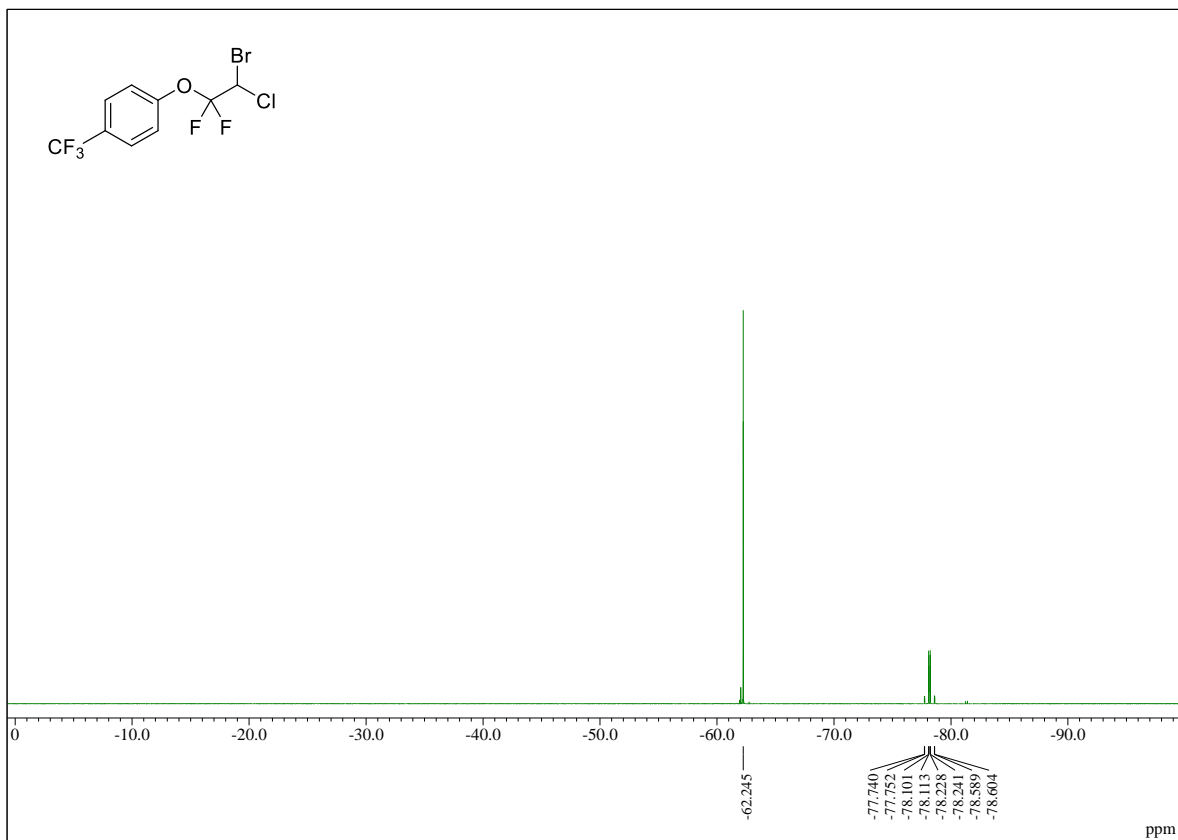

**Ethyl *p*-(2-bromo-2-chloro-1,1-difluoroethoxy)benzoate (2f)**

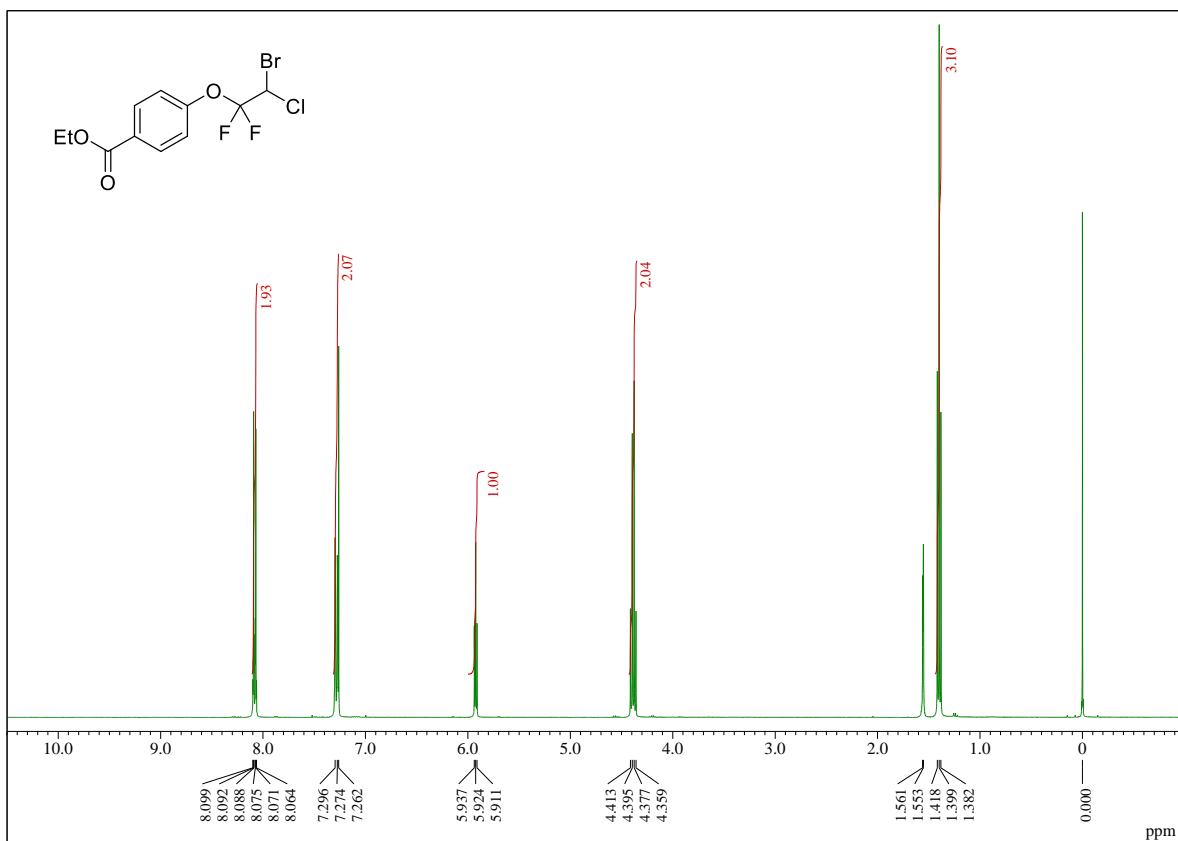

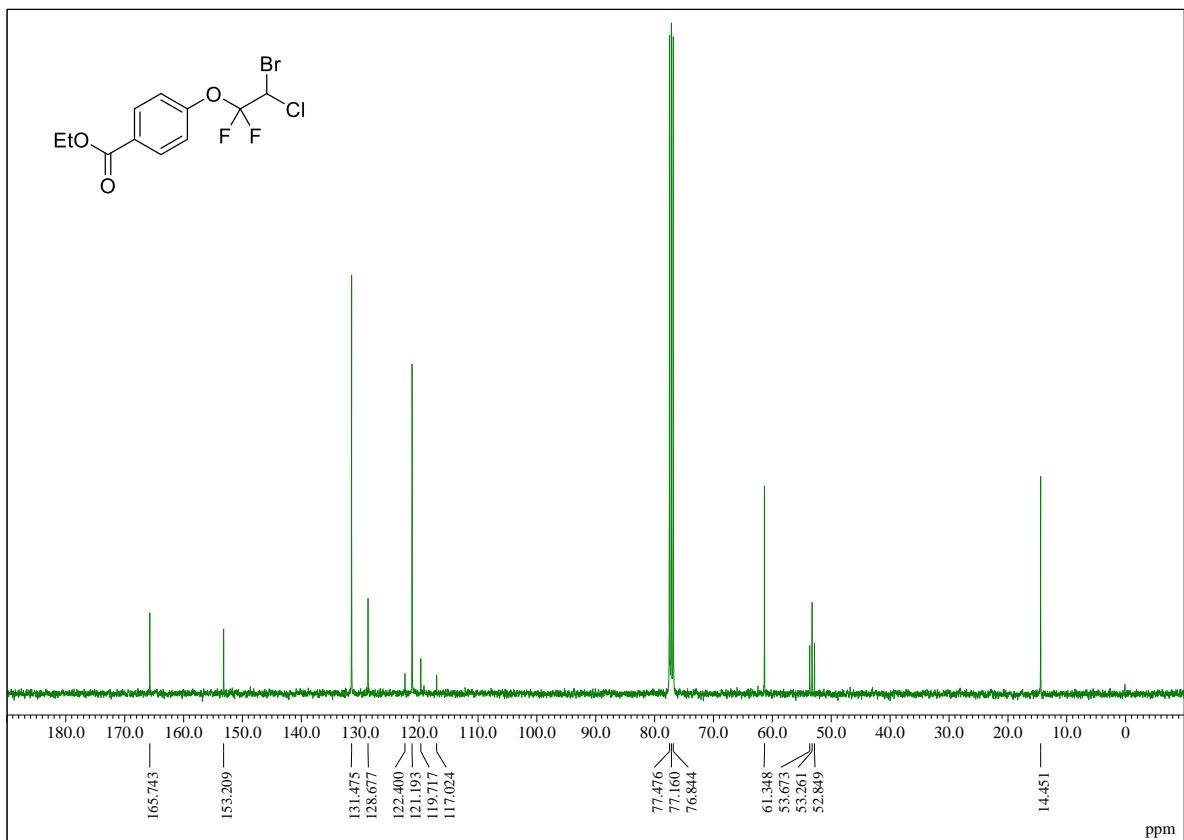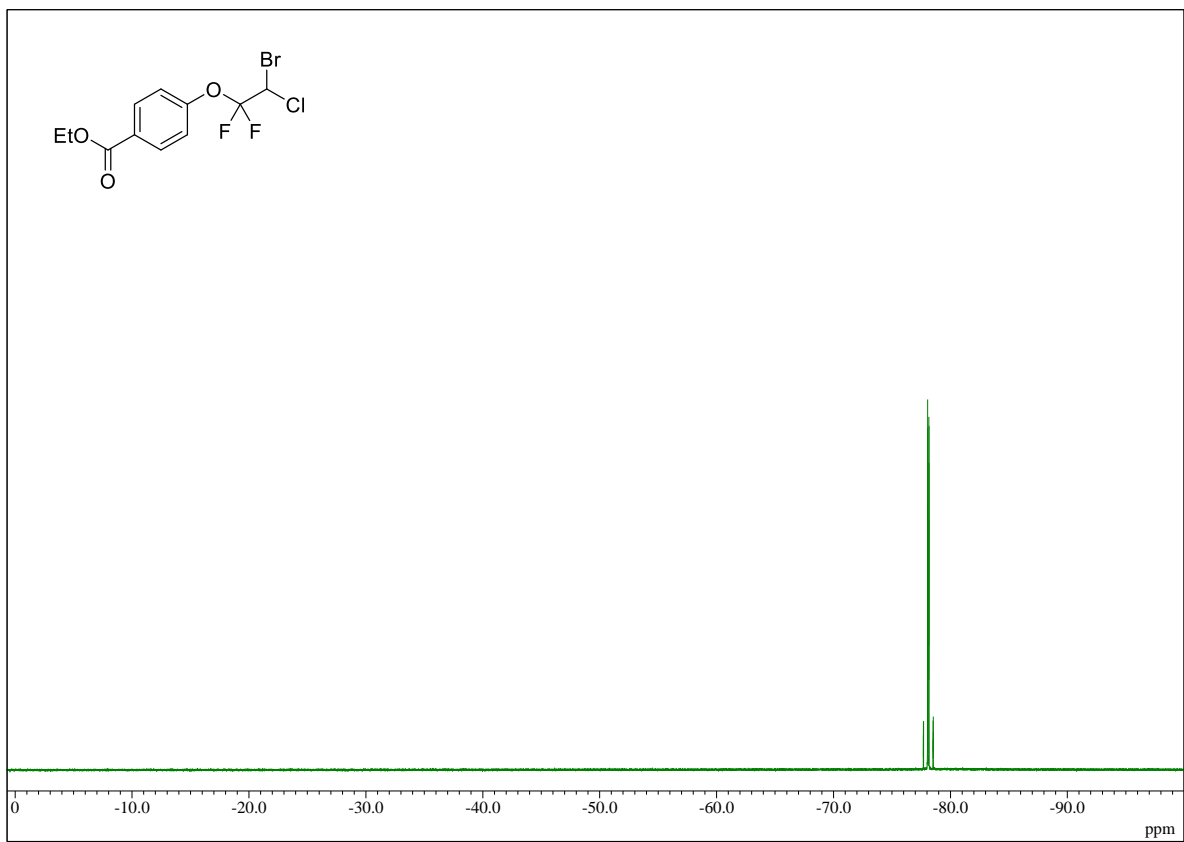

## 2-Bromo-2-chloro-1,1-difluoroethyl *o*-phenylphenyl ether (2h)

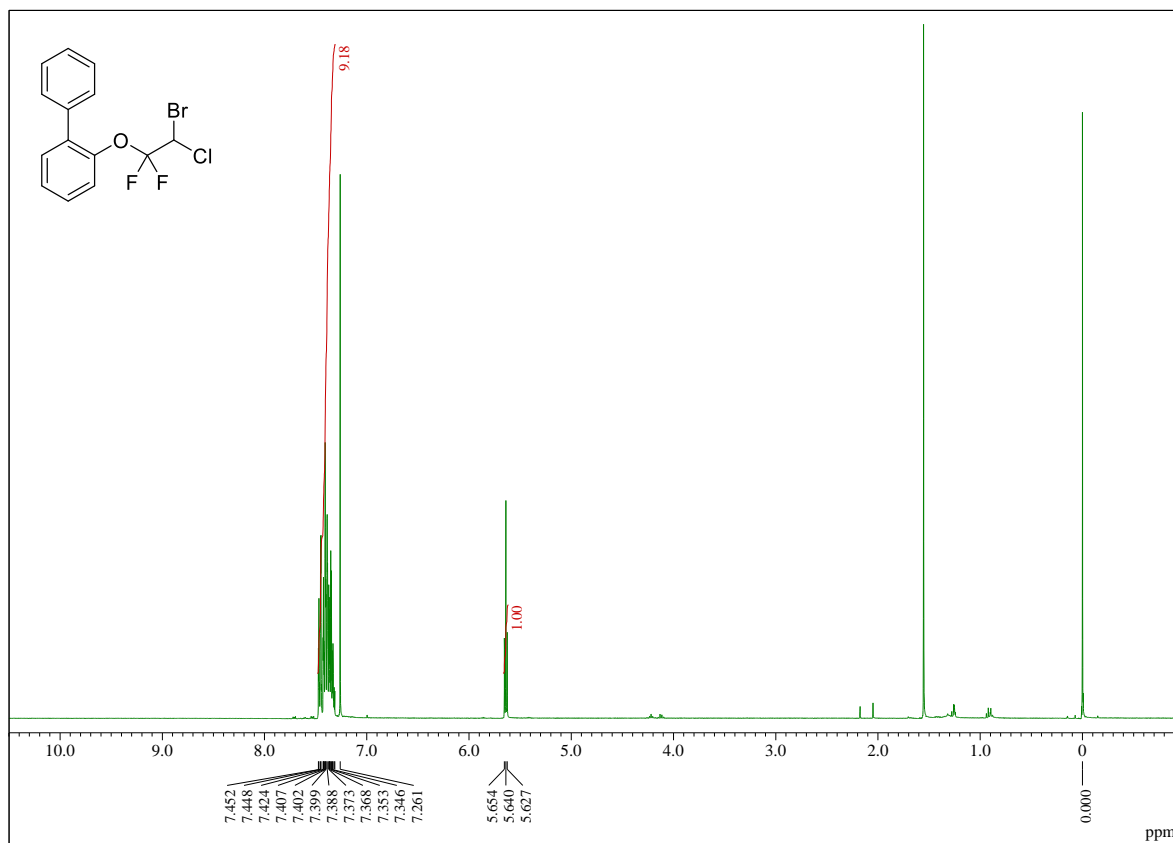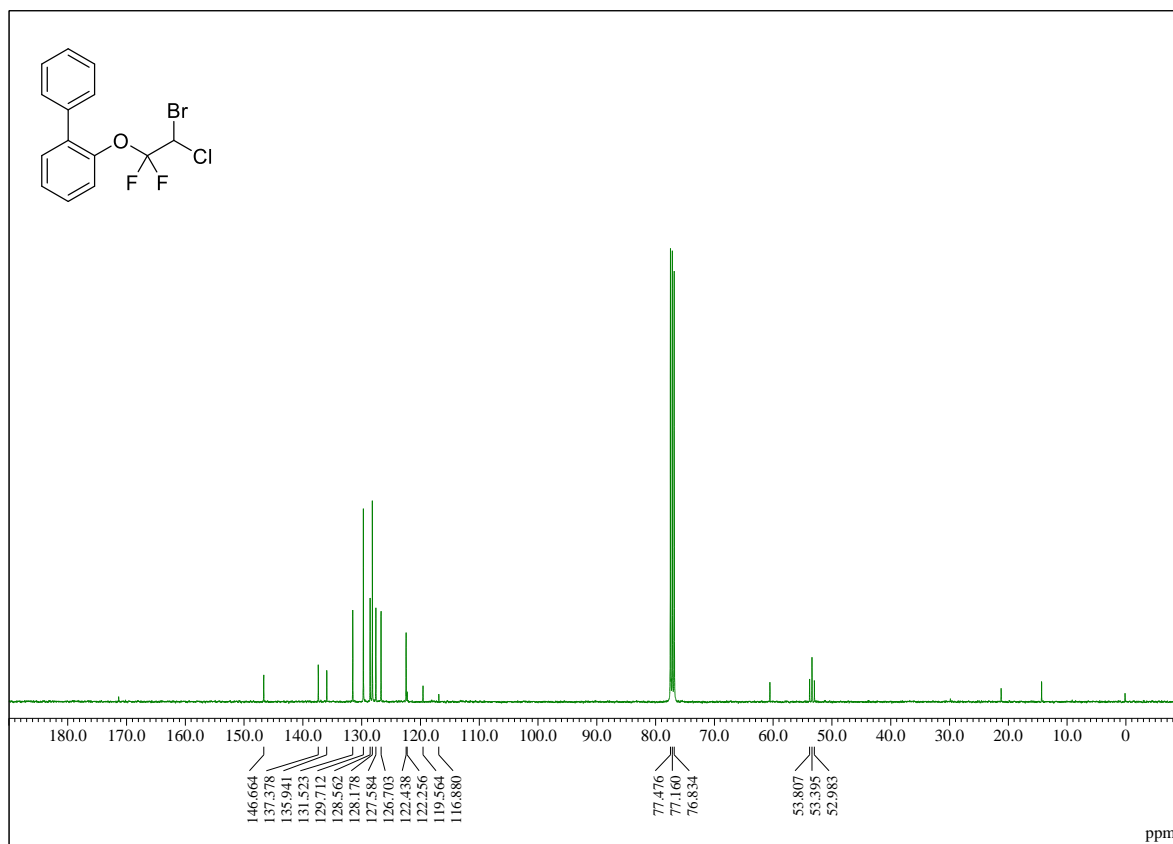

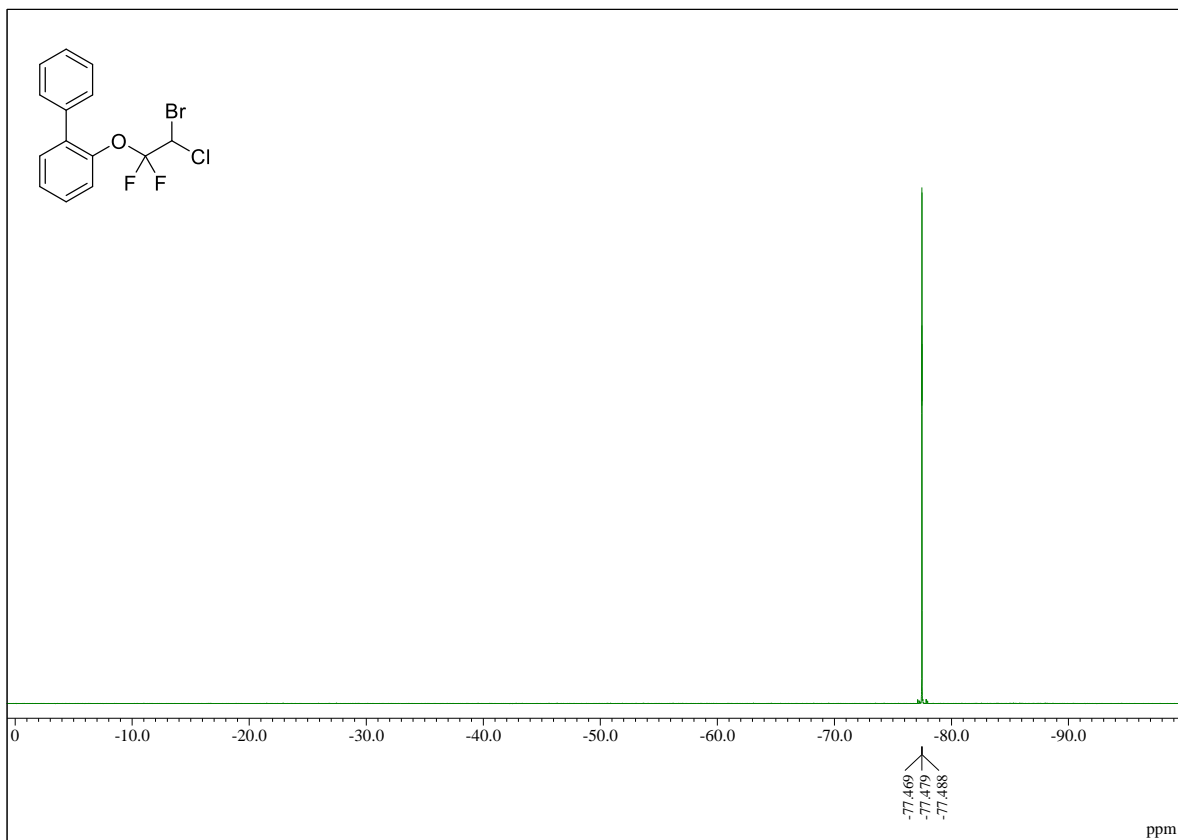

**2-Bromo-2-chloro-1,1-difluoroethyl *m*-phenylphenyl ether (2i)**

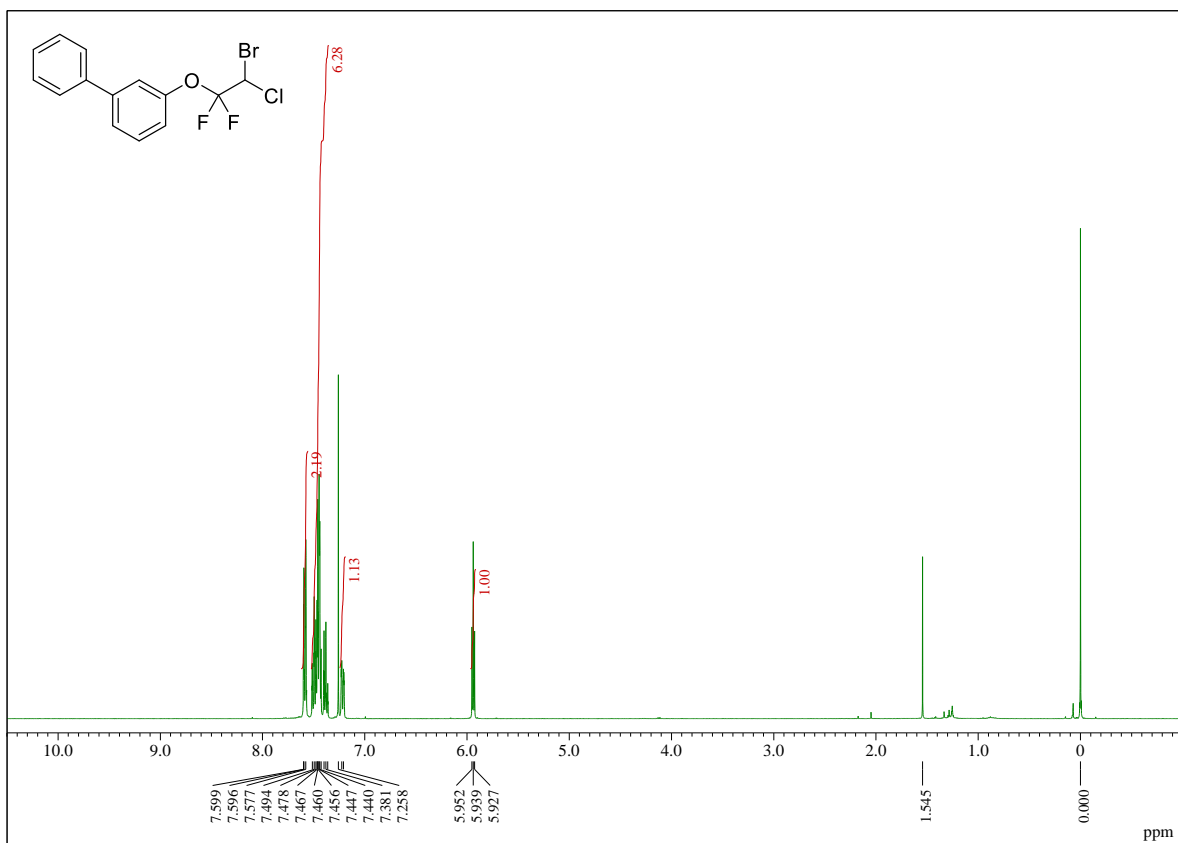



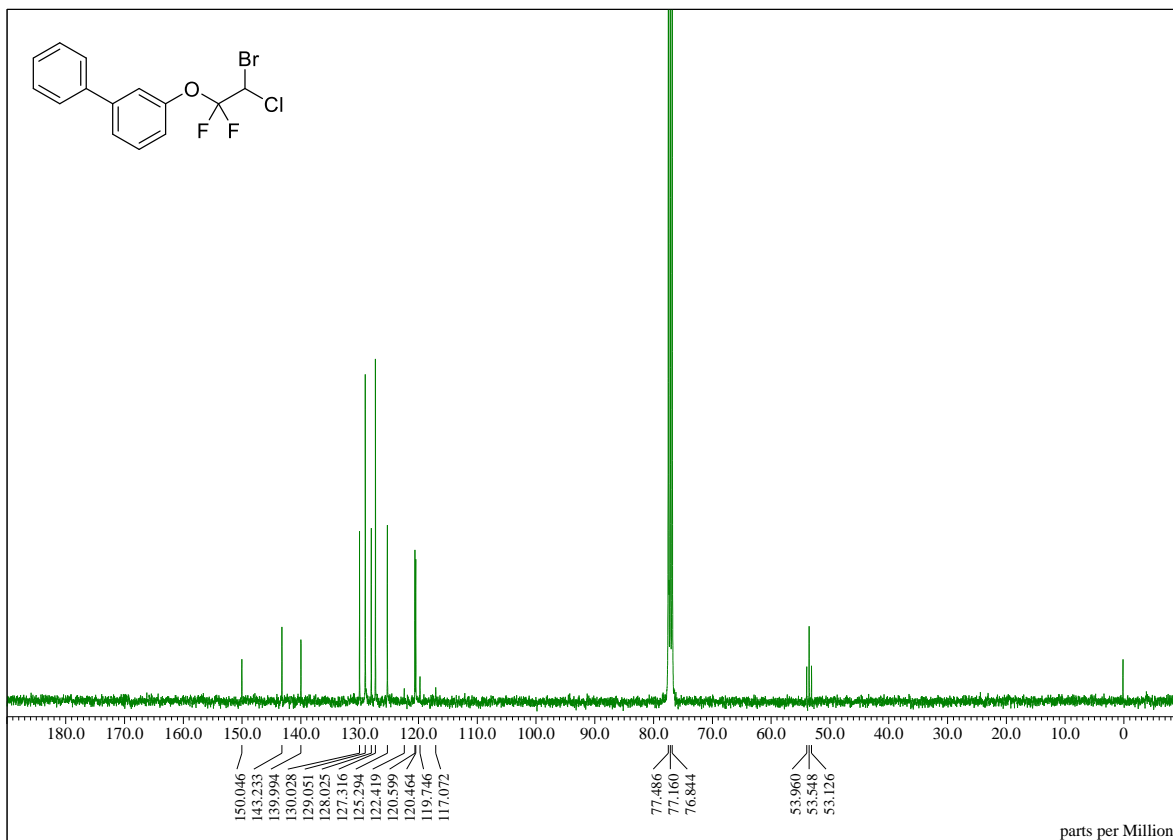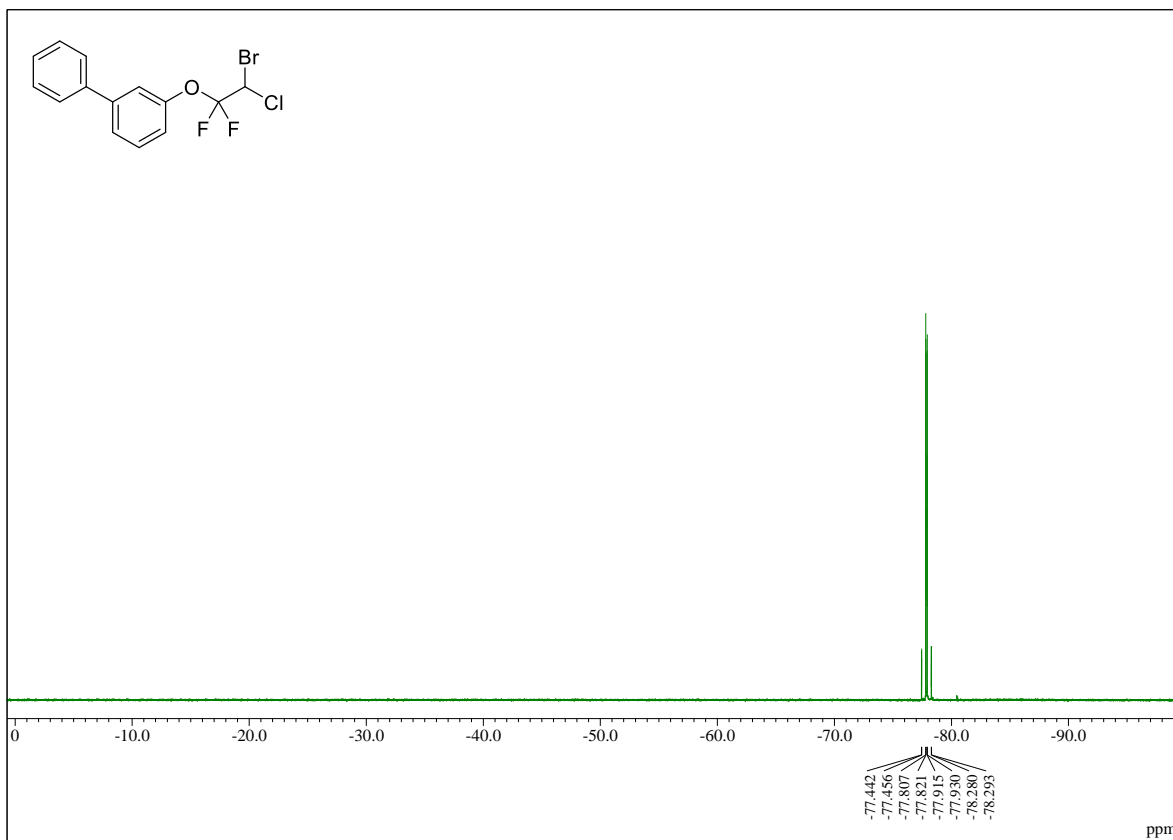

## 2-Bromo-2-chloro-1,1-difluoroethyl *p*-phenylphenyl ether (2j)

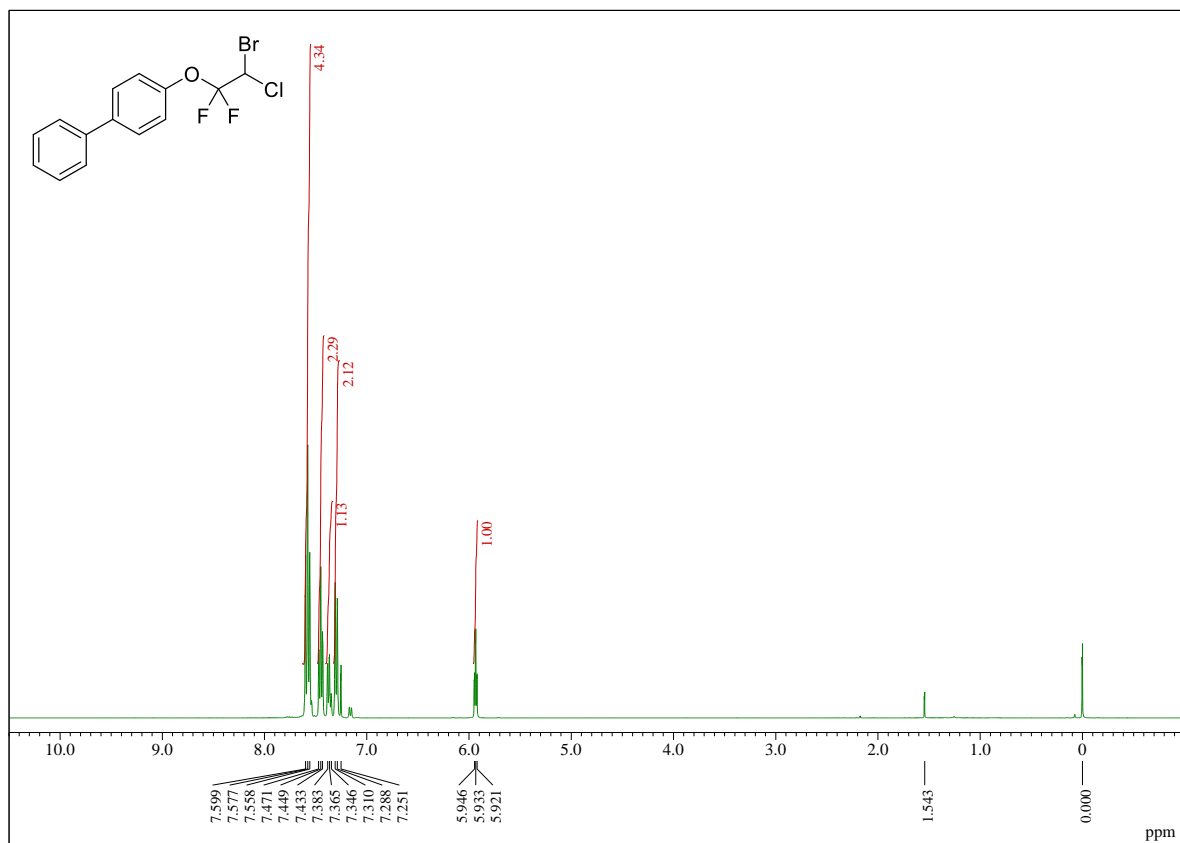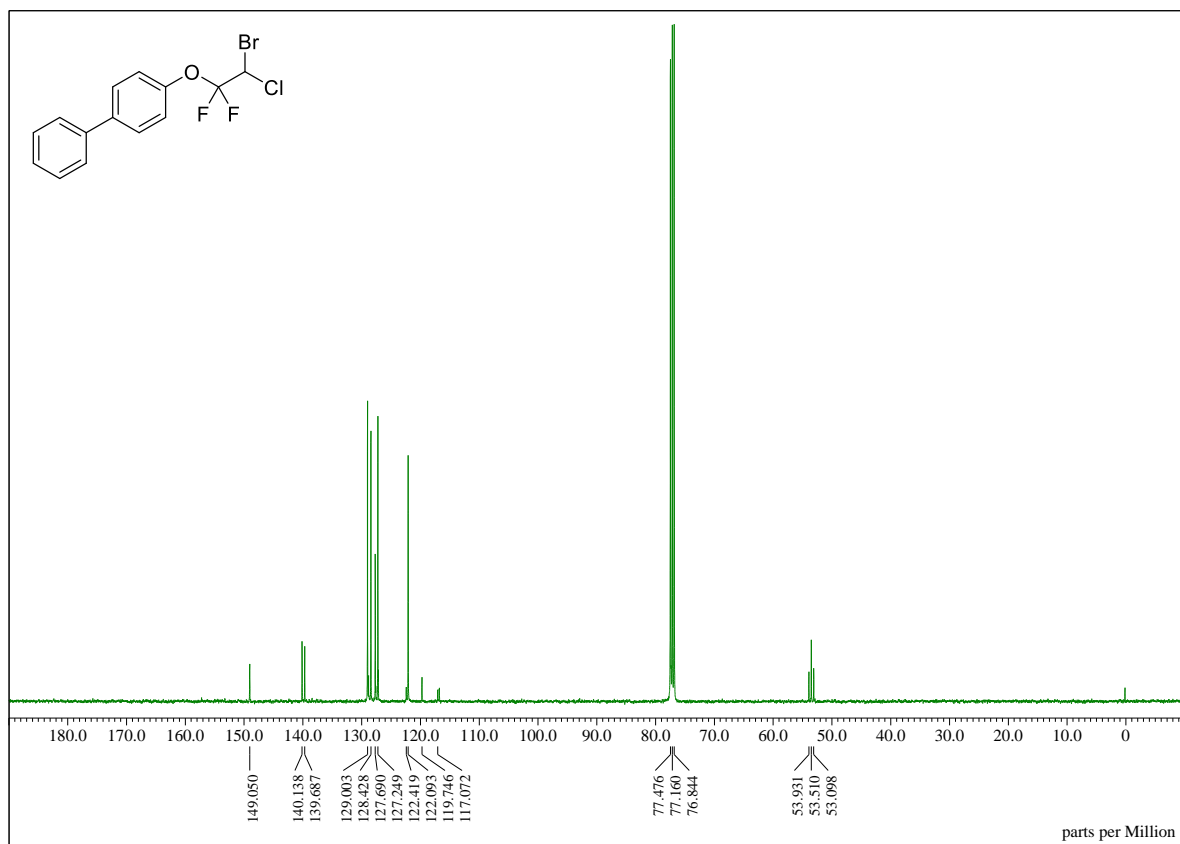

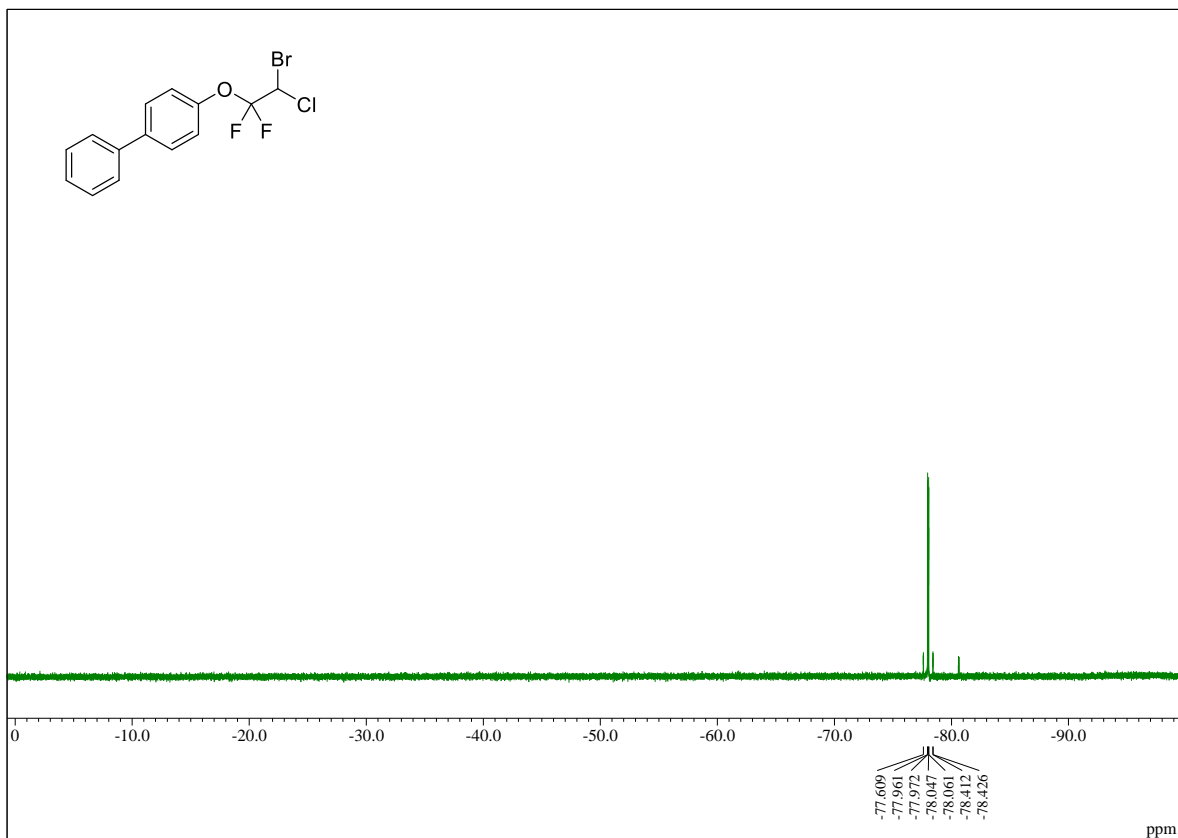

**2-Bromo-2-chloro-1,1-difluoroethyl 1-naphthyl ether (2k)**

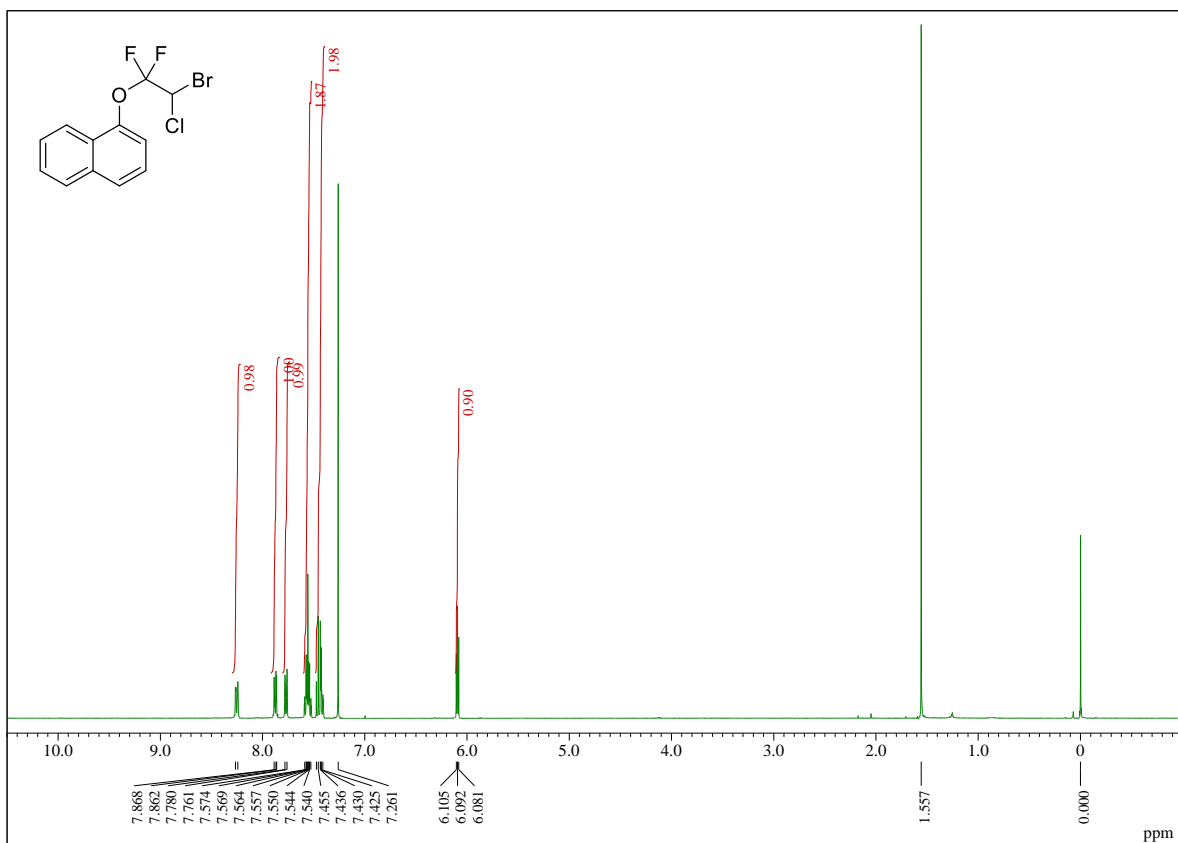

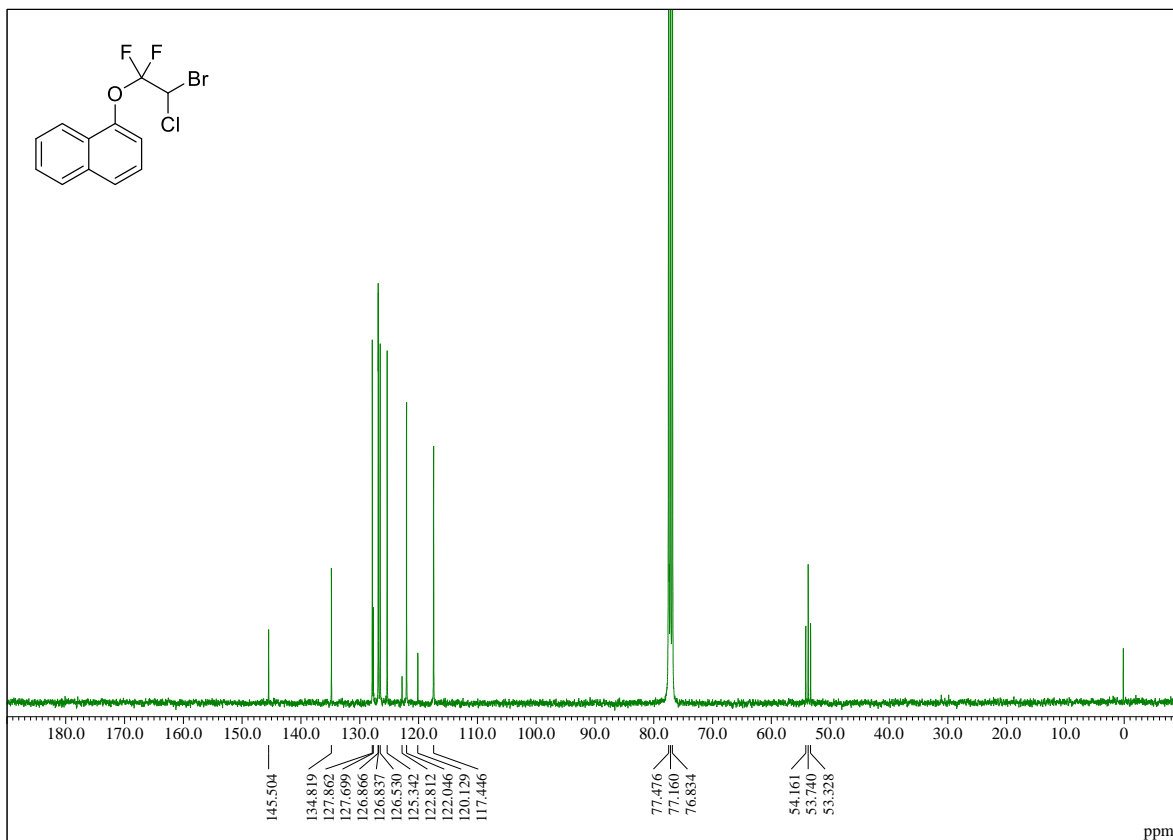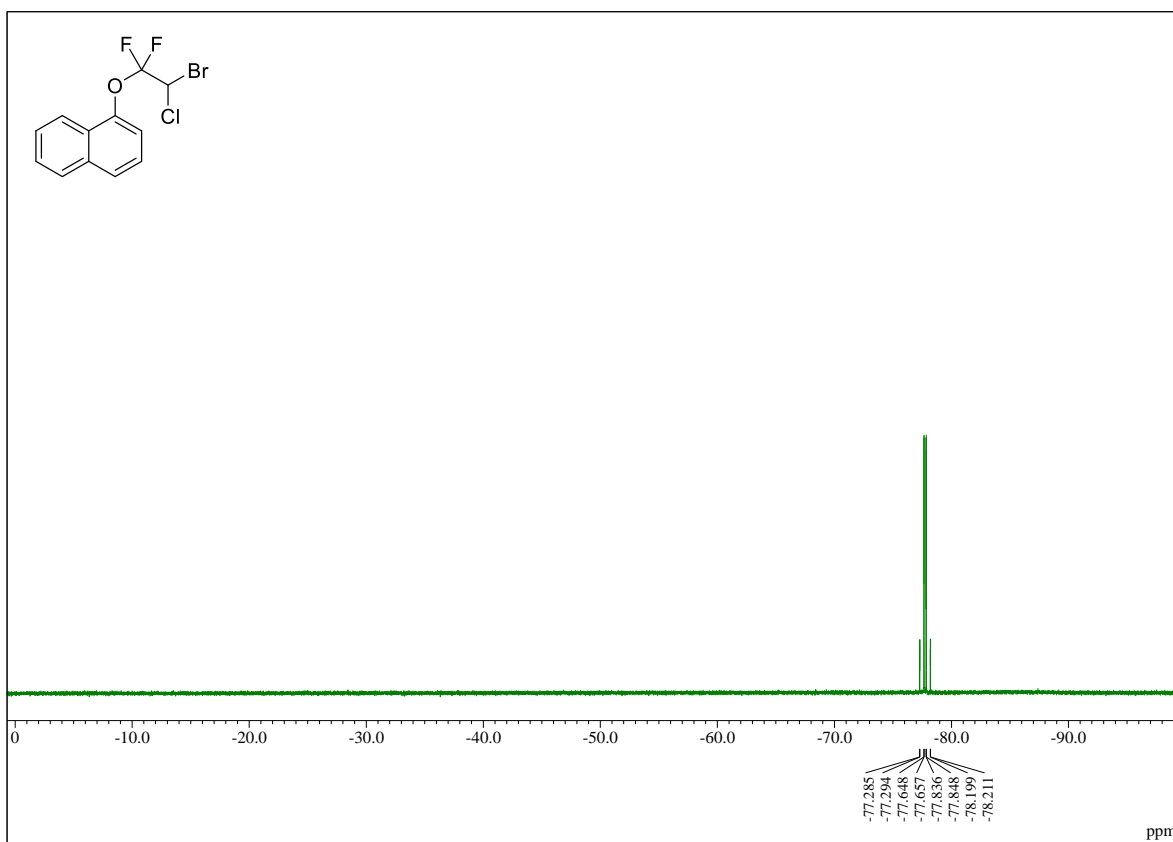

## 2-Bromo-2-chloro-1,1-difluoroethyl *o*-iodophenyl ether (2I)

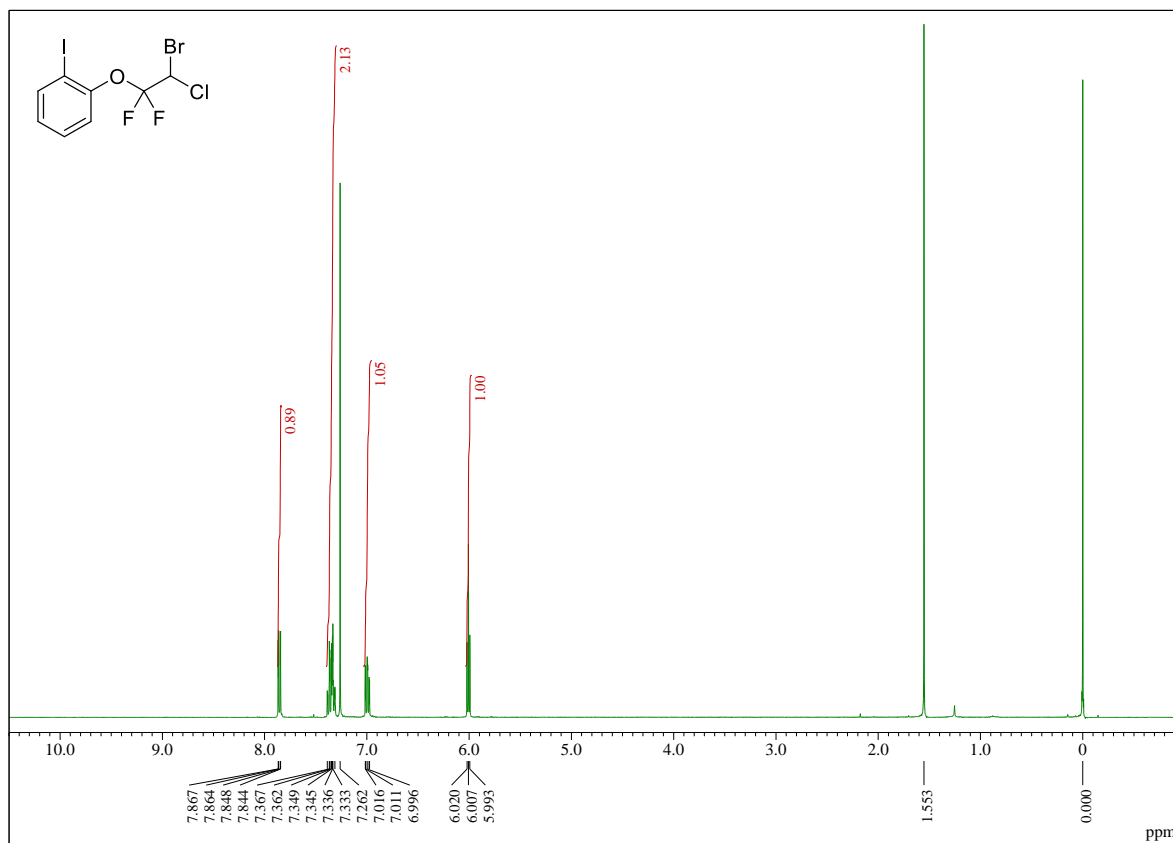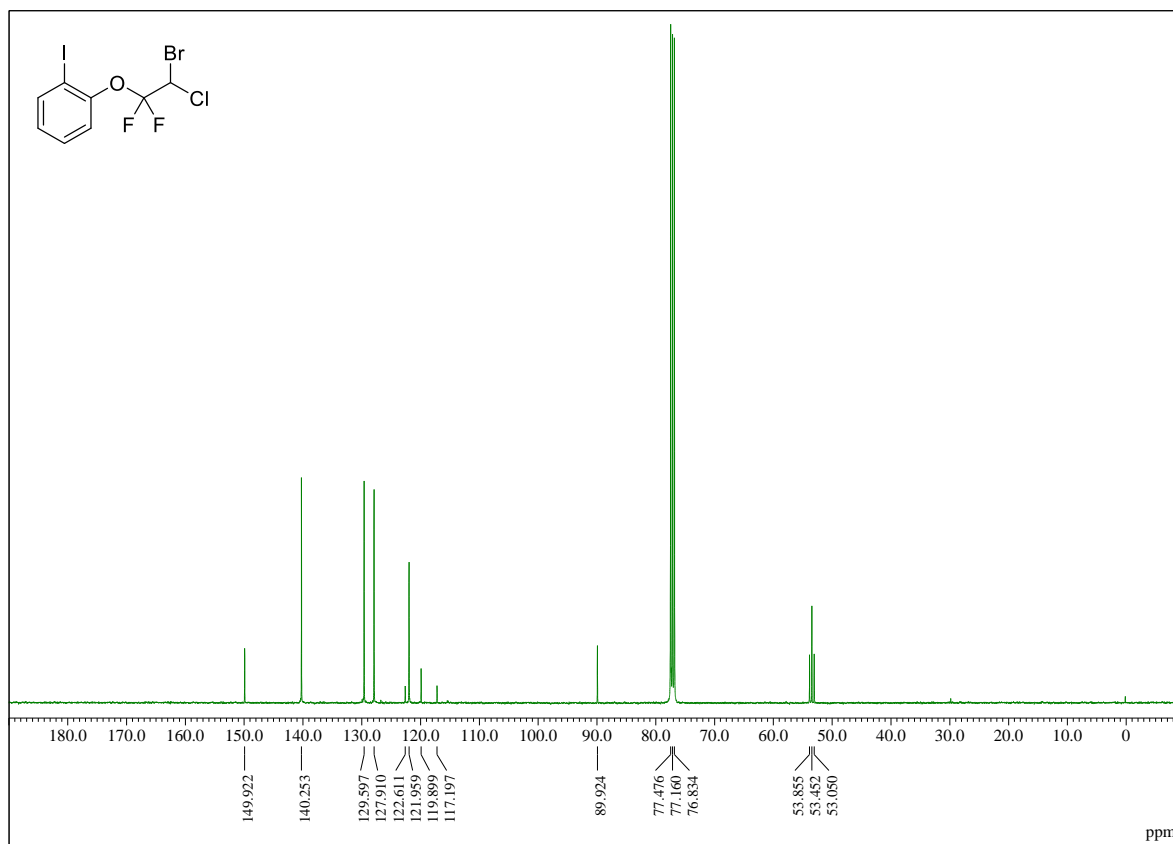

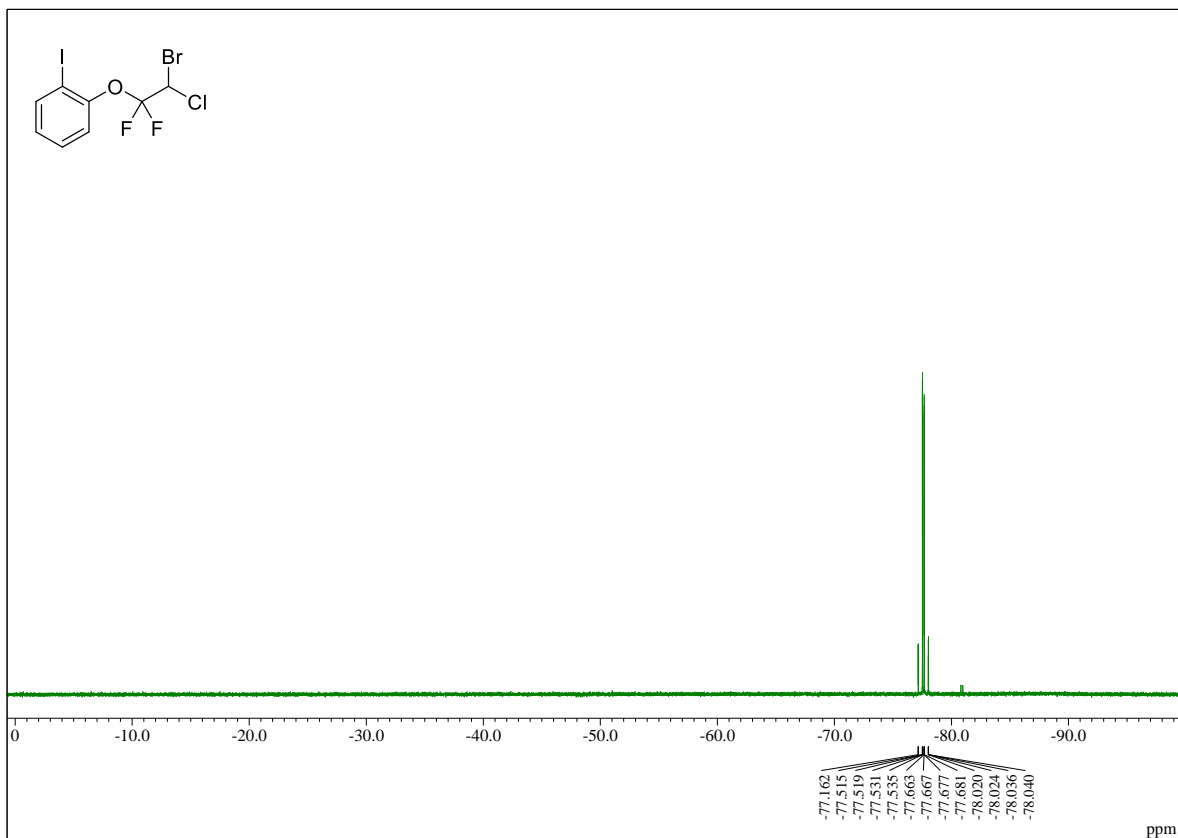

***o*-Allylphenyl 2-bromo-2-chloro-1,1-difluoroethyl ether (2m)**

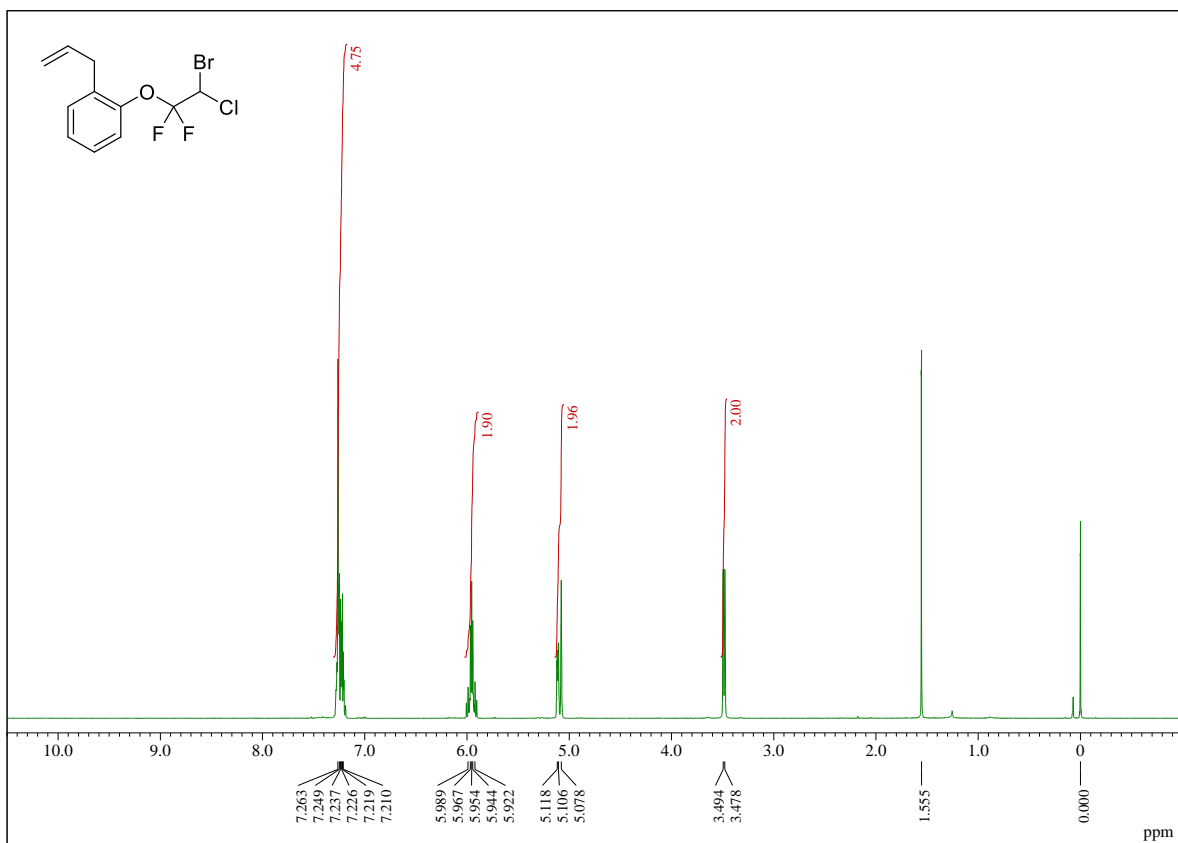

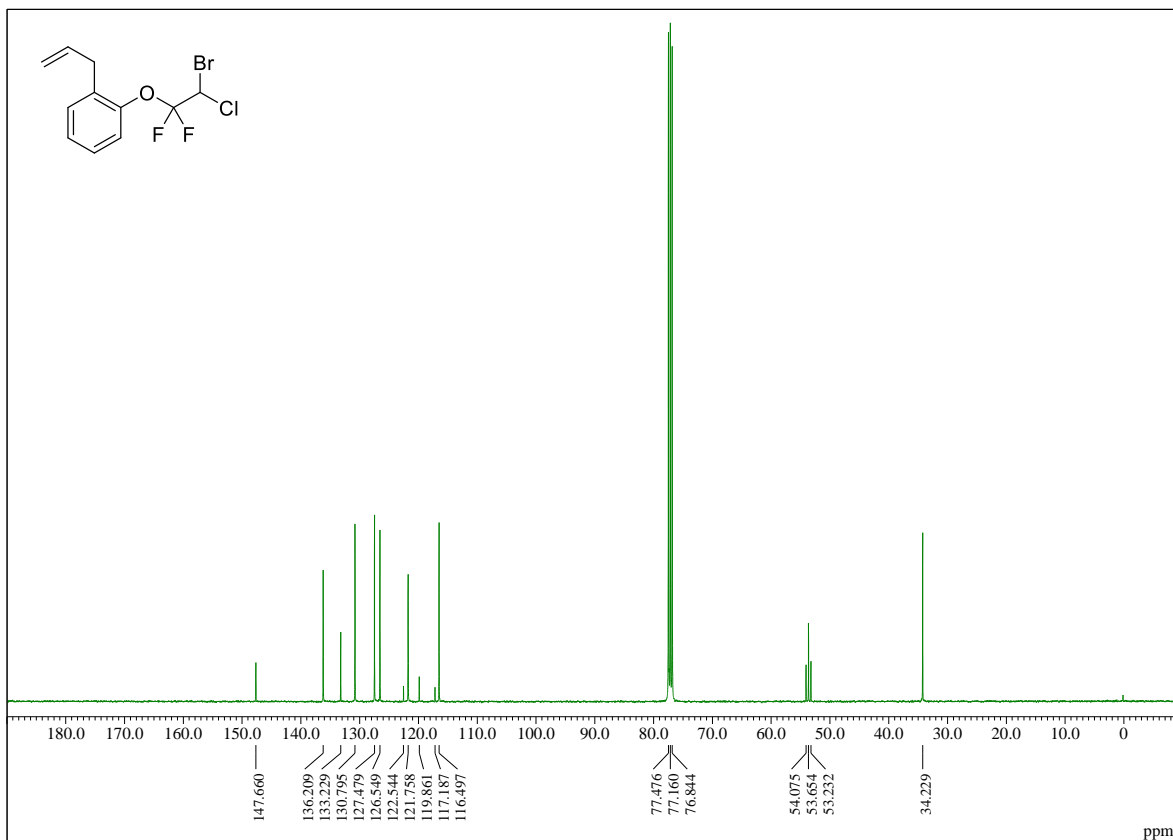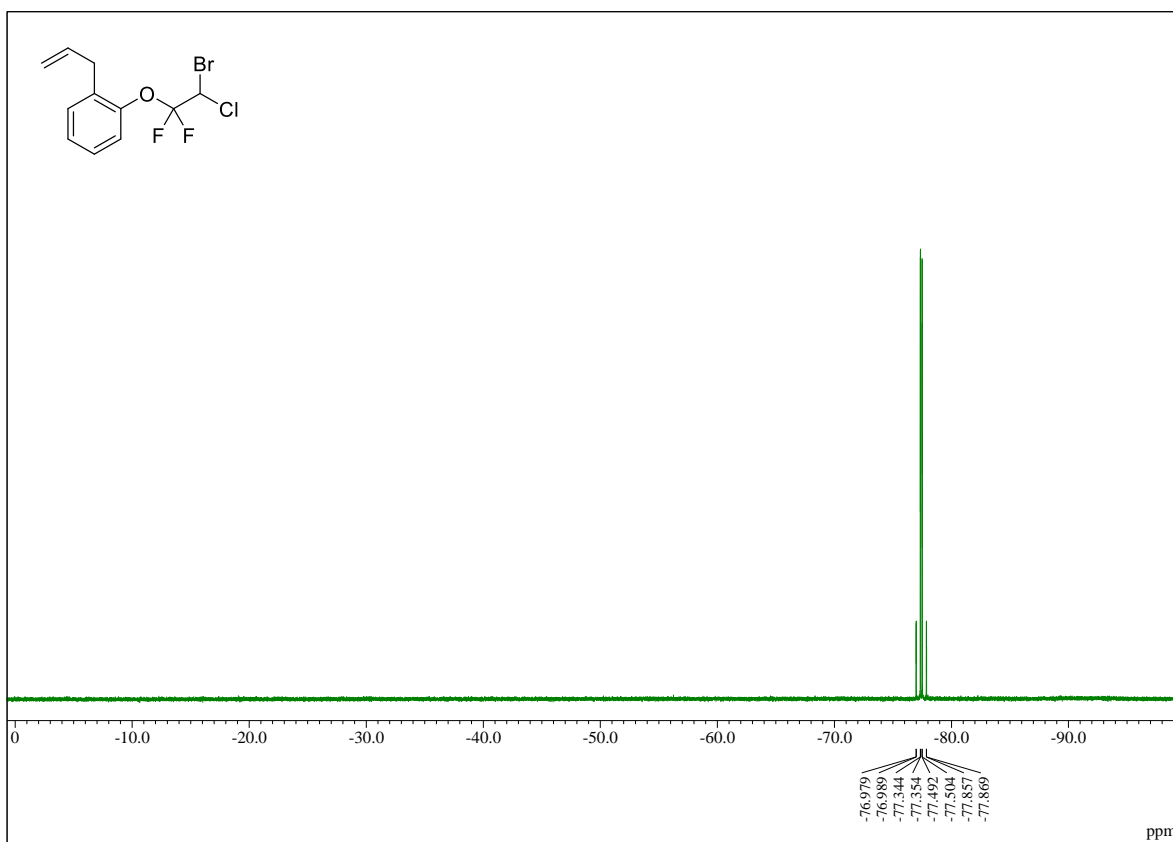

## 2-Bromo-2-chloro-1,1-difluoroethyl *o*-propenylphenyl ether (2n)

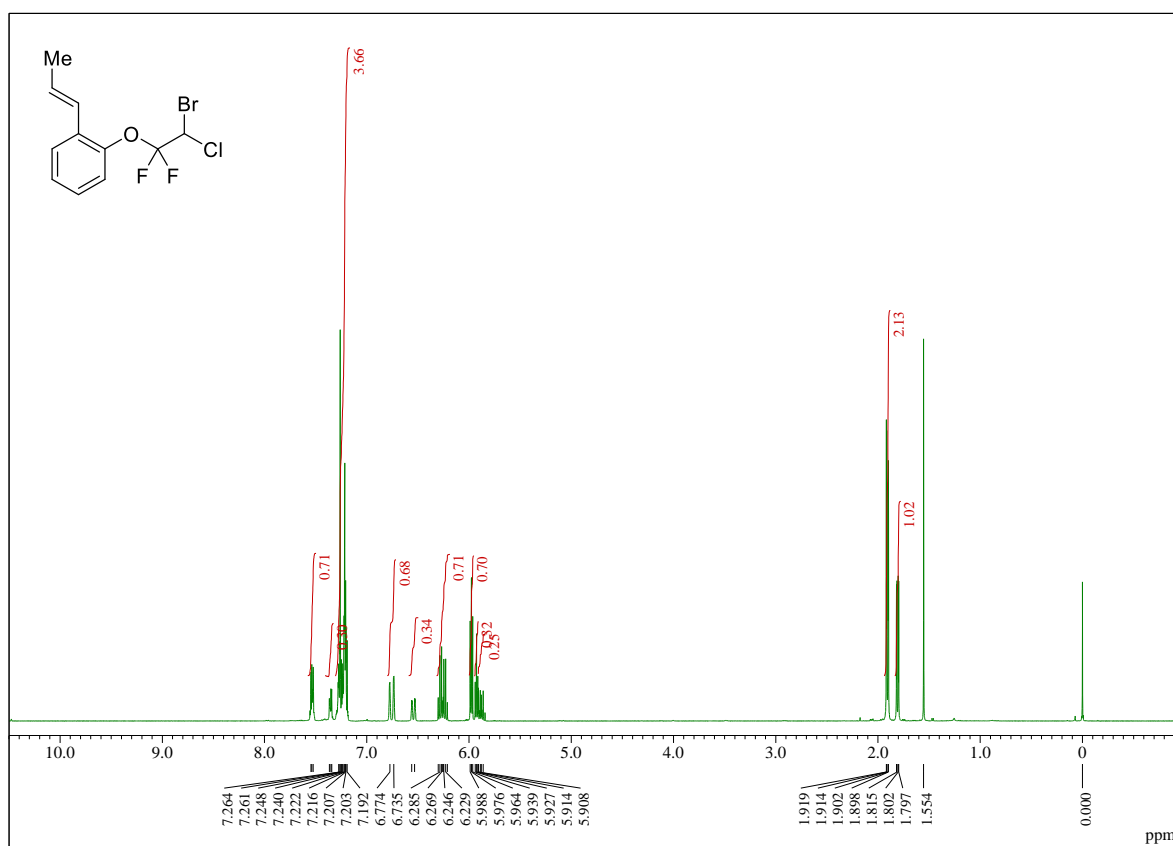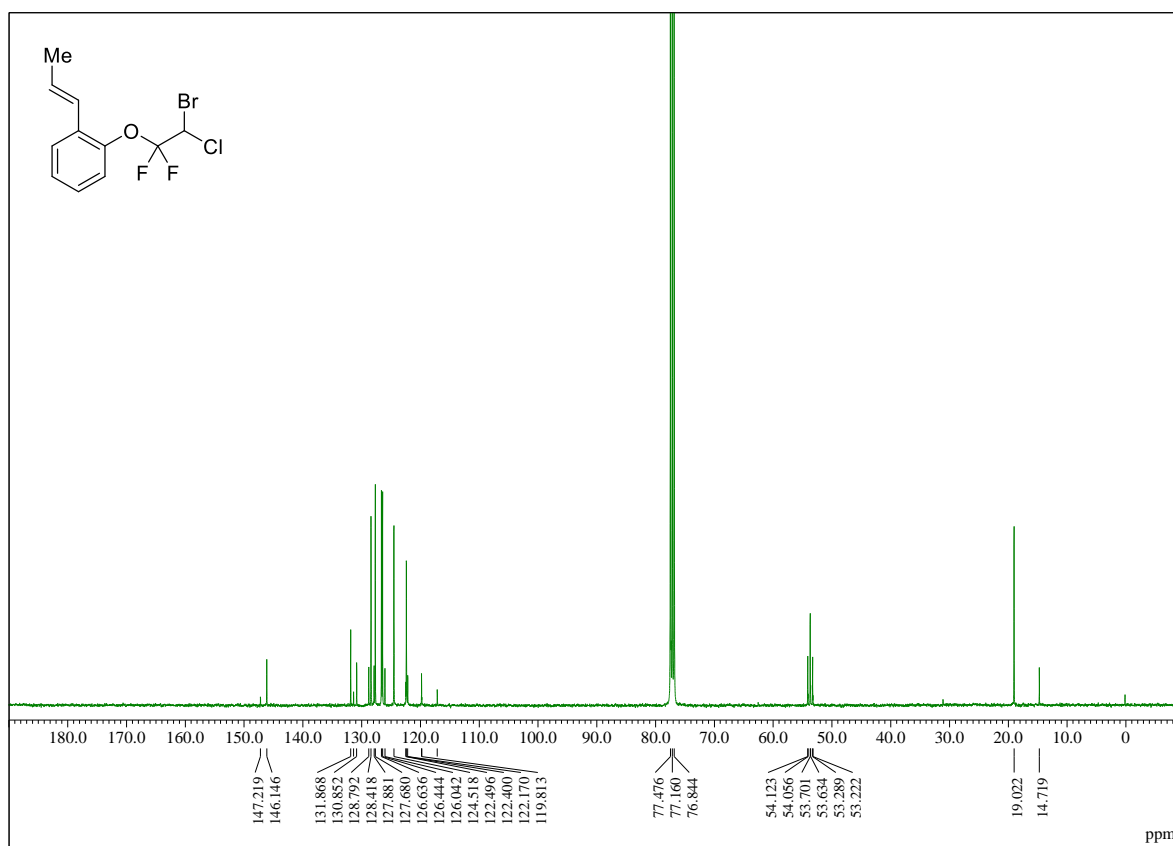



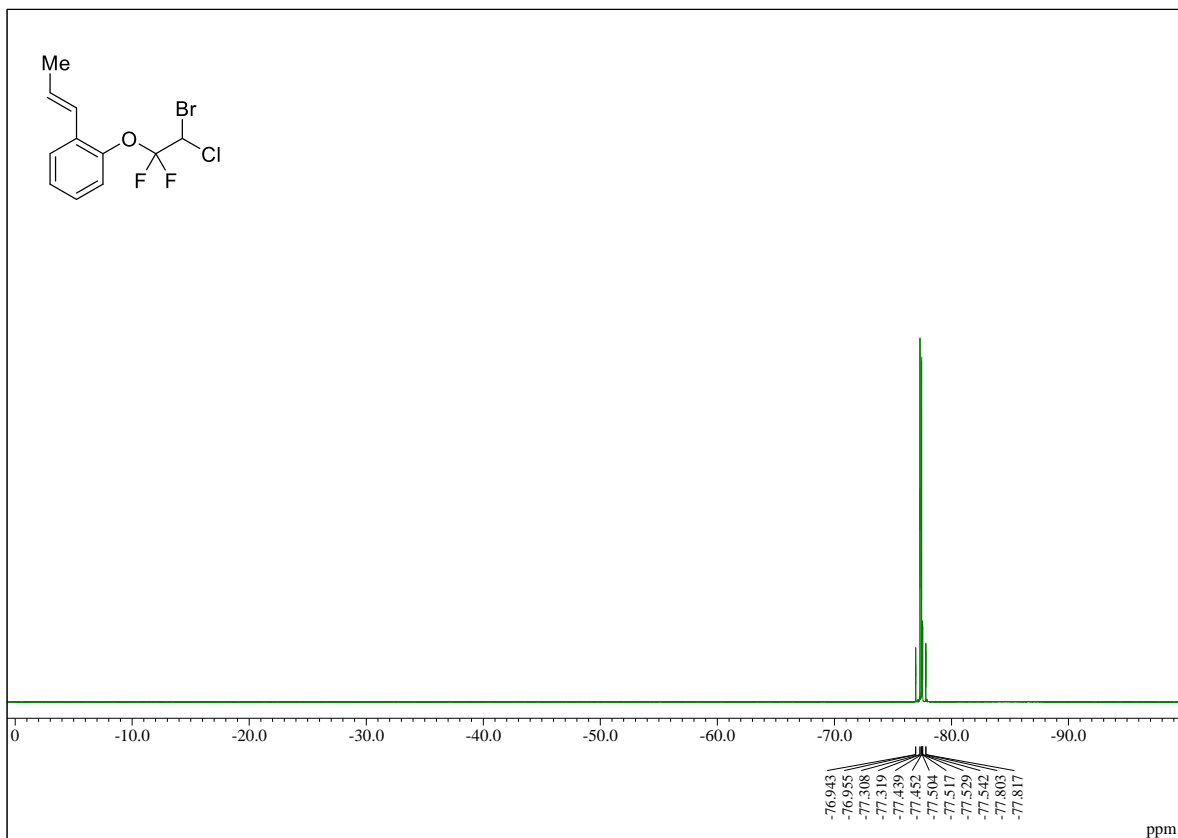

**(E)-2'-(2-Bromo-2-chloro-1,1-difluoroethoxy)-chalcone (2o)**

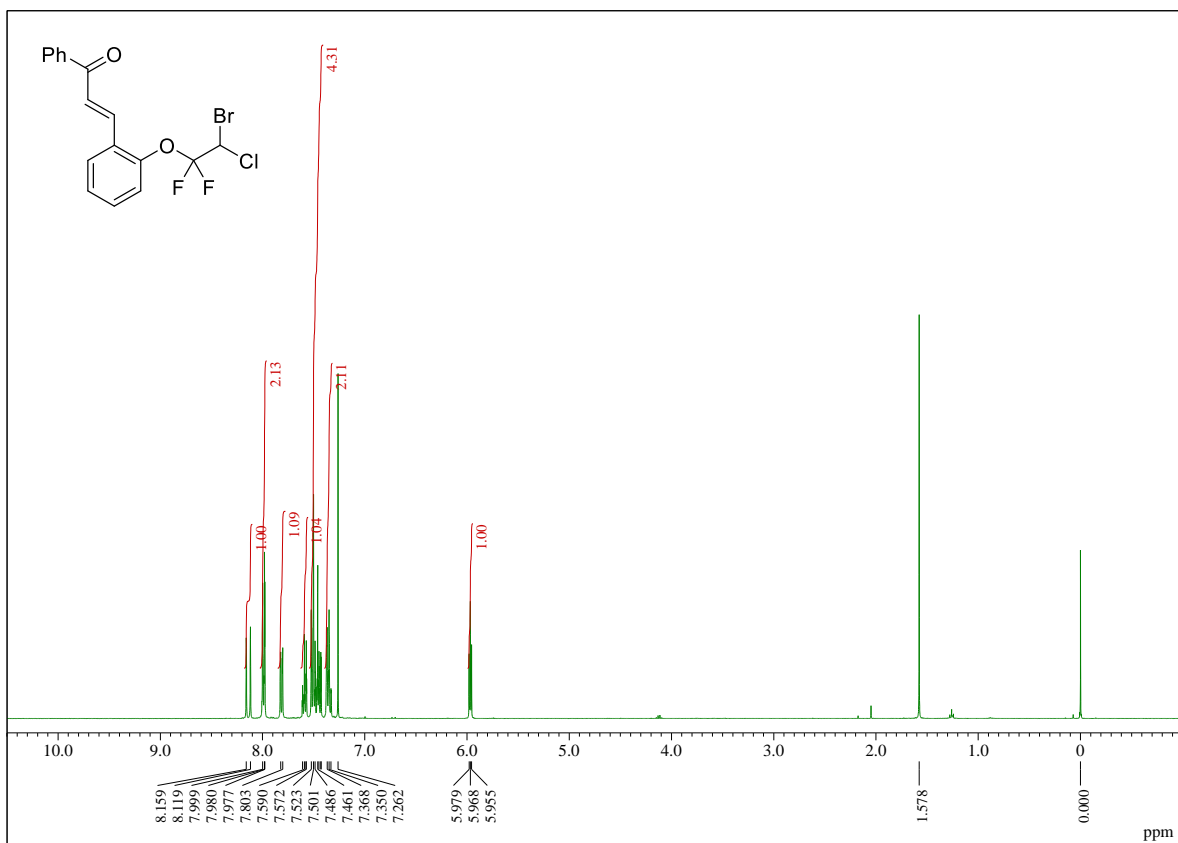

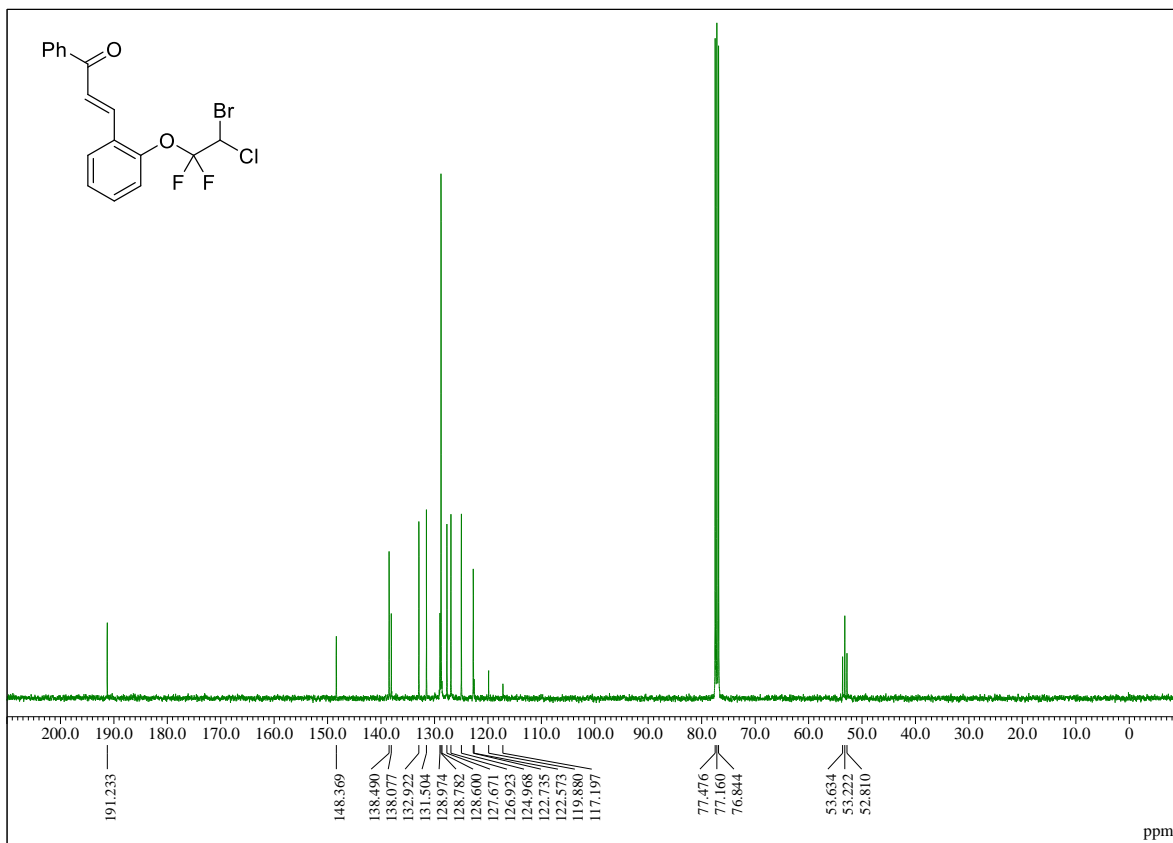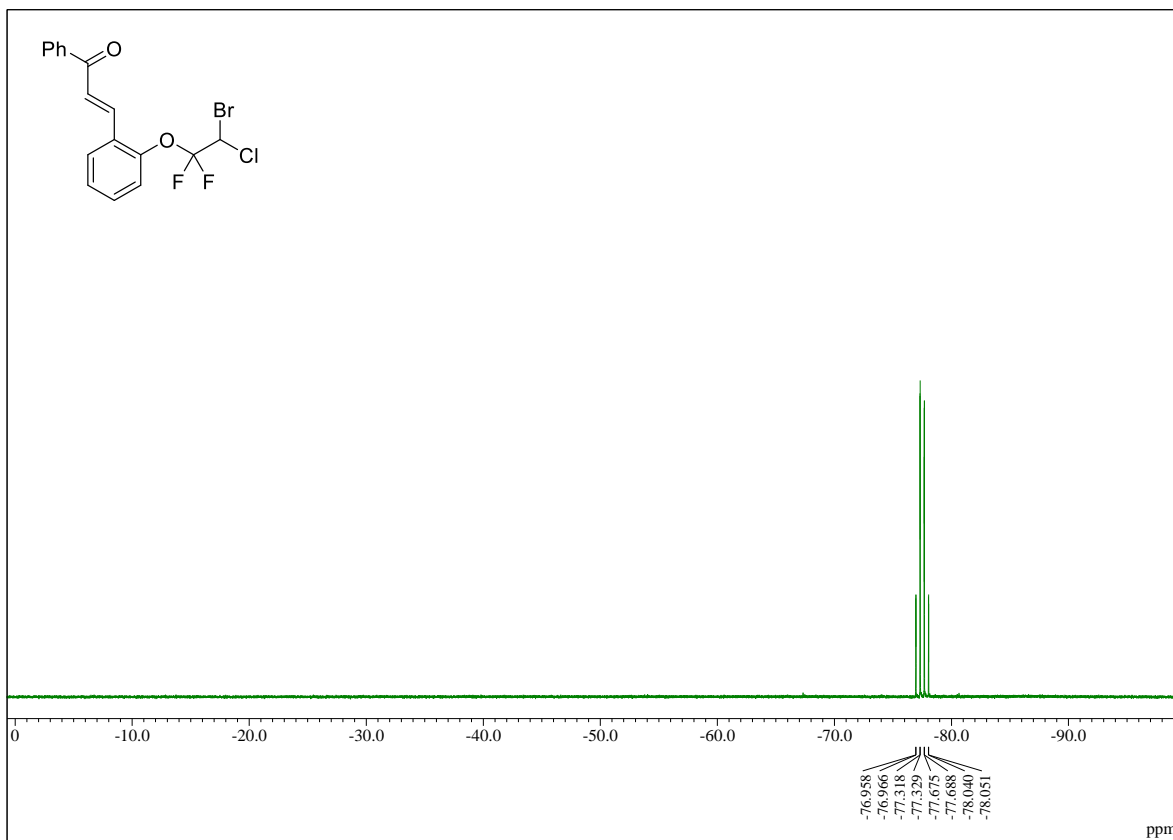

***o*-Aminophenyl 2-bromo-2-chloro-1,1-difluoroethyl ether (2p)**

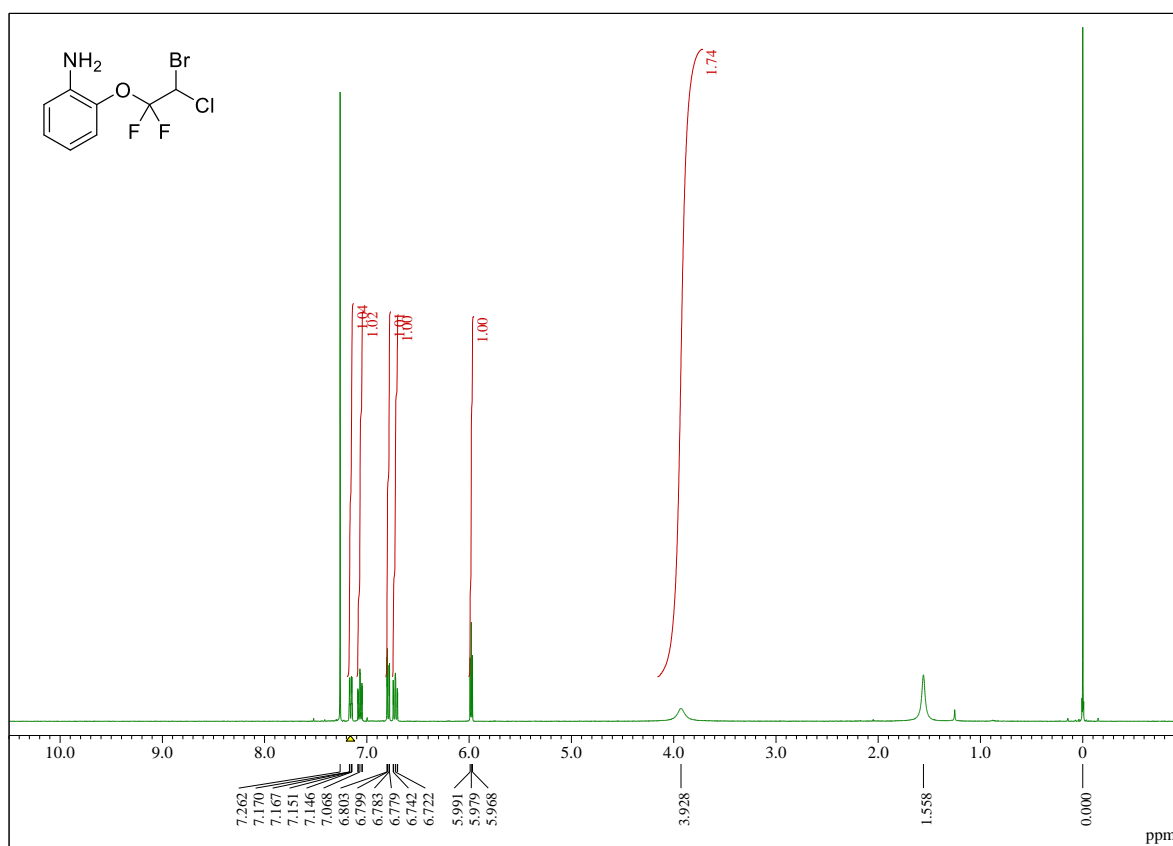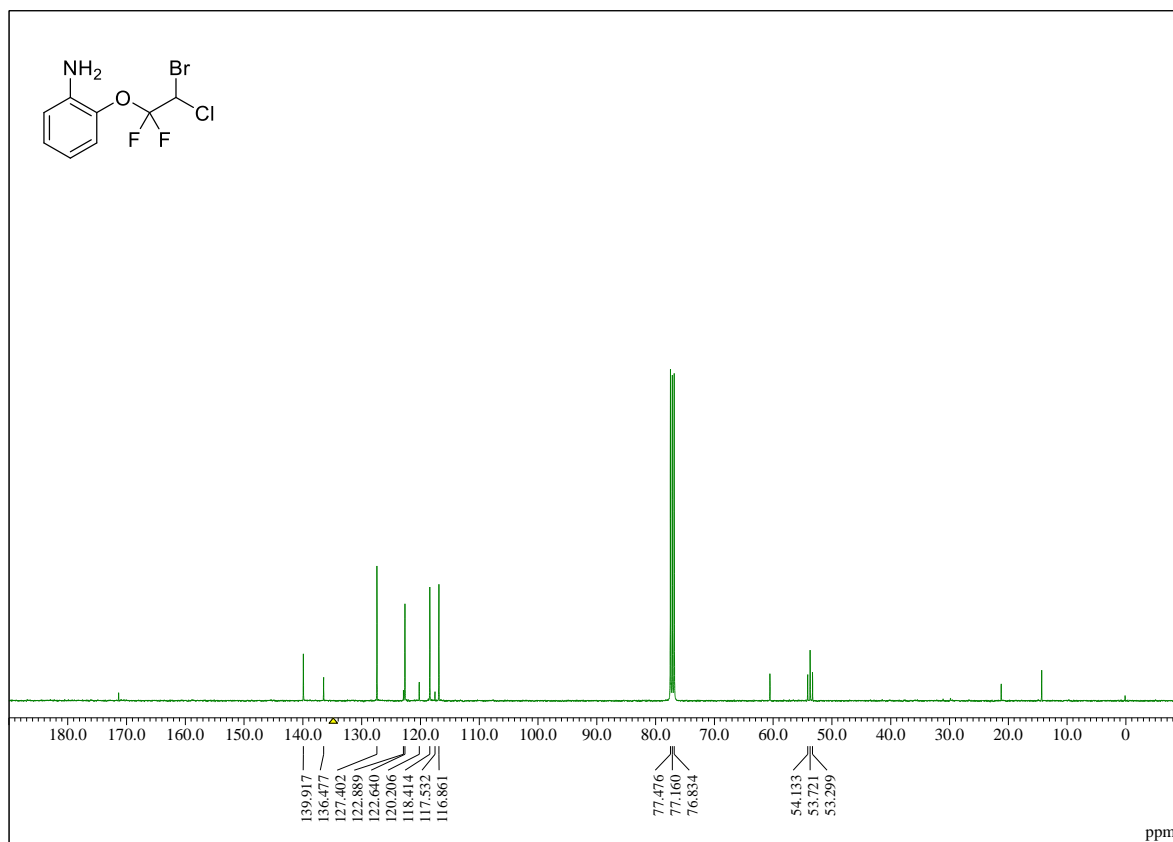

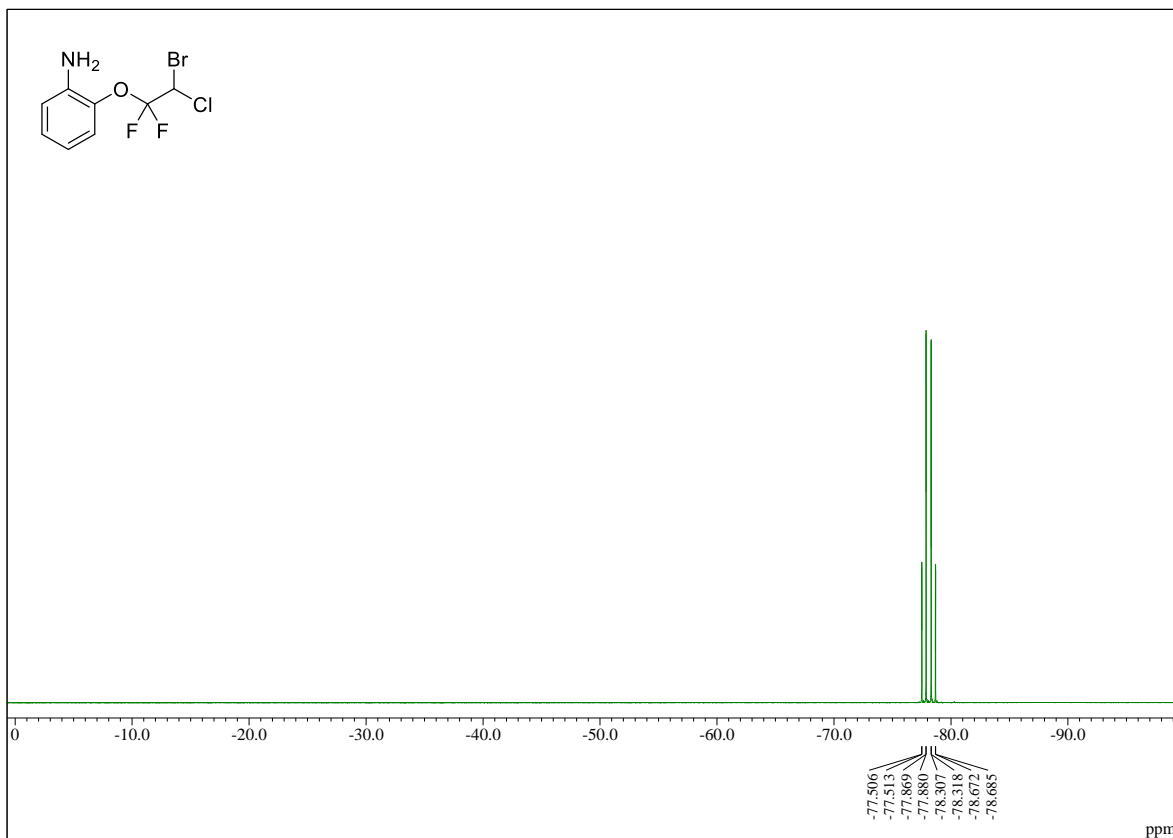

### 4-Benzoylmethyl-3-chloro-2,2-difluorochromane (3)

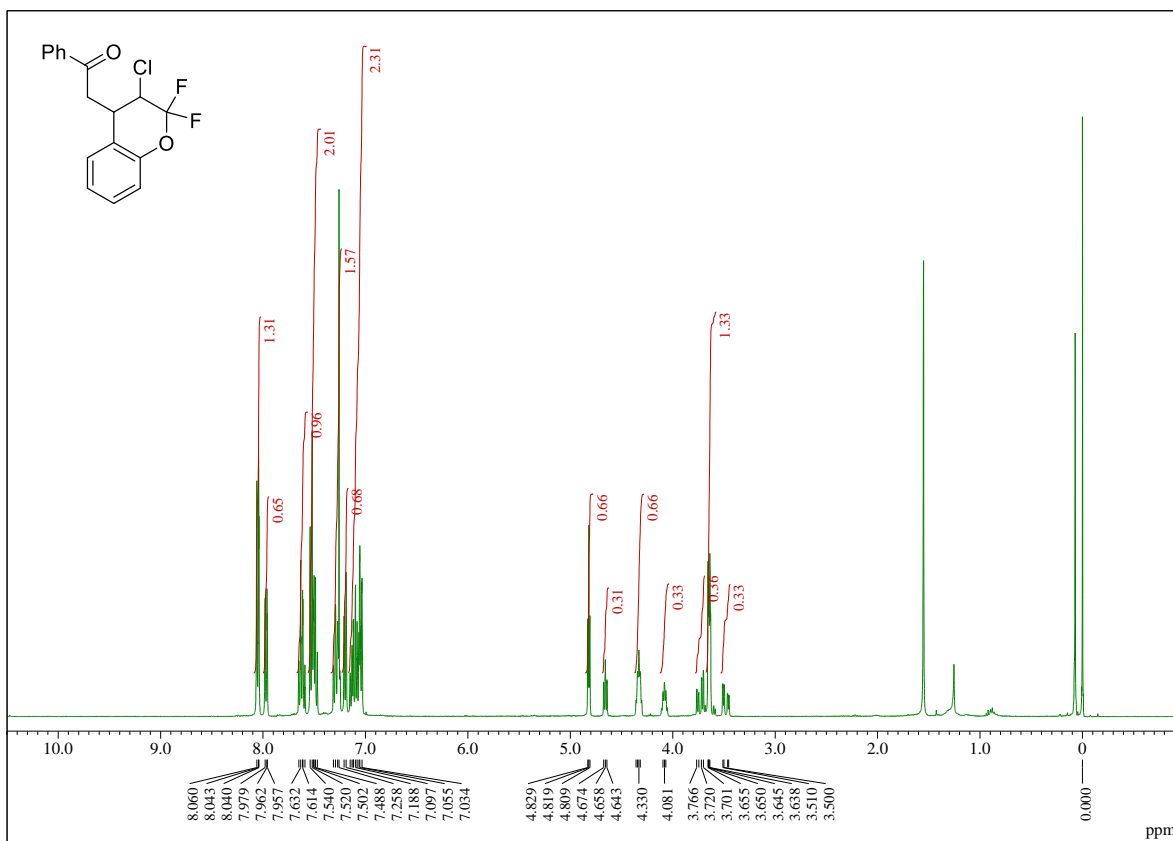

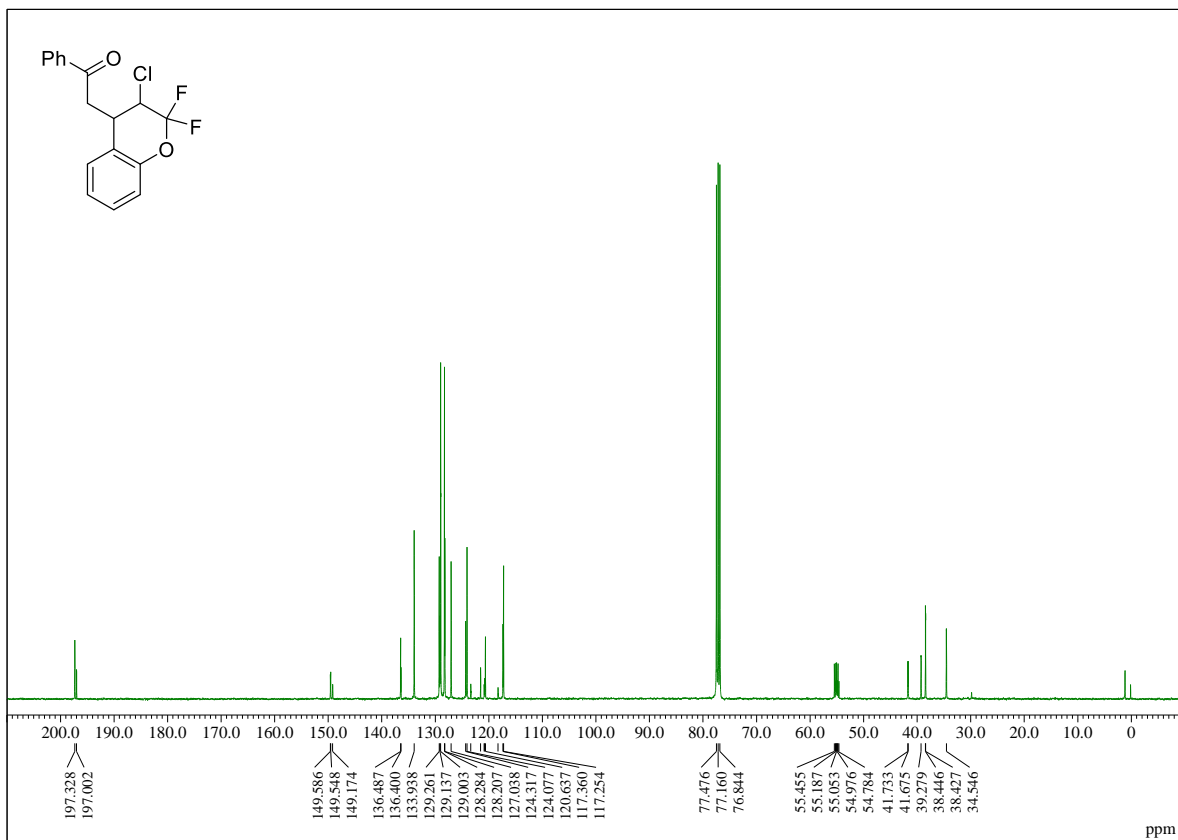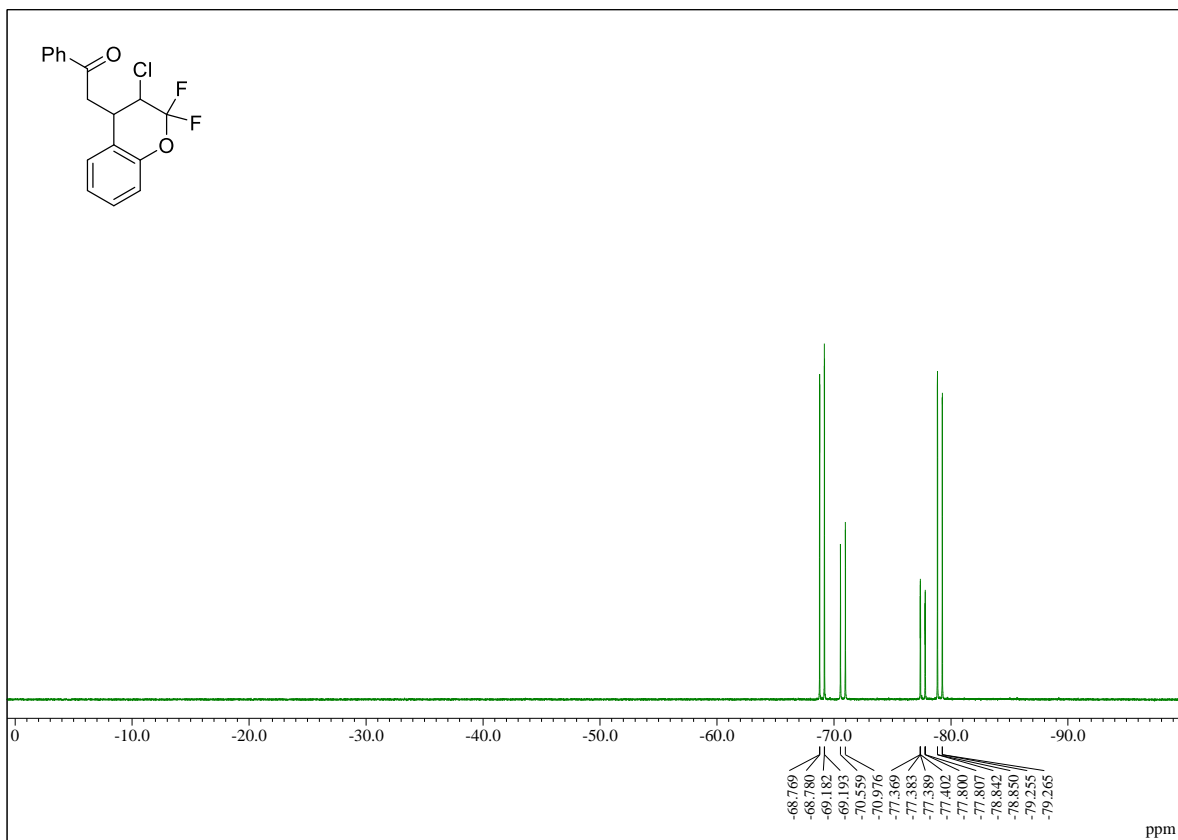

Supplement: Additional file 1 [file 1860-5397-17-9-S1.pdf]
